# Supplementary material for: Total synthesis of pyrano[3,2-e]indole alkaloid fontanesine B by a double cyclization strategy
Source: Royal Society of Chemistry journal article supplement (doi:10.1039/c9ra02321f), 2019-01-01

# Total Synthesis of Pyrano[3,2-*e*]indole Alkaloid Fontanesine B by Double Cyclization Strategy

Tomoki Itoh, Yuusuke Chiba, Shunsuke Kawaguchi, Yuki Koitaya, Yuuma Yoneta,  
Koji Yamada and Takumi Abe\*

Faculty of Pharmaceutical Sciences, Health Sciences University of Hokkaido, Ishikari-tobetsu, Hokkaido  
0610293, Japan

E-mail: [abe-t@hoku-iryo-u.ac.jp](mailto:abe-t@hoku-iryo-u.ac.jp)

## SUPPORTING INFORMATION

### Contents

|                                                                  |       |
|------------------------------------------------------------------|-------|
| 1. General Experimental-----                                     | S2    |
| 2. Experimental Procedure-----                                   | S2-7  |
| 3. Copies of <sup>1</sup> H and <sup>13</sup> C NMR spectra----- | S7-33 |

## Experimental Section

### 1. General Experimental

Melting points were recorded with a Yanaco MP3 and are uncorrected. High-resolution MS spectra were recorded with a JEOL JMS-T100LP mass spectrometers. IR spectra were measured with a Shimadzu IRAffinity-1 spectrometer. The NMR experiments were performed with a JEOL JNM-ECA500 (500 MHz) spectrometer, and chemical shifts are expressed in ppm ( $\delta$ ) using residual undeuterated solvent as an internal reference. The following abbreviations were used to explain NMR peak multiplicities: s = singlet, d = doublet, t = triplet, q = quartet, m = multiplet. Flash column chromatography was performed on silica gel (Silica Gel 60N, Kanto Chemical Co., Ltd.).

### 2. Experimental Procedure

#### General Procedure for the Synthesis of 4

A mixture of serotonin hydrochloride (2.55 g, 12 mmol) and aldehyde (10.0 mmol) in MeOH (150 mL) was stirred at room temperature for 0.5 h. Then to the mixture was added sodium cyanoborohydride (943 mg, 15 mmol) and stirred at room temperature for 1.5 h until the complete disappearance of starting material as indicated by TLC. After MeOH was removed by evaporation, saturated NaHCO<sub>3</sub> (150 mL) and AcOEt (150 mL) were added the residue. The whole was extracted with AcOEt (3 x 200 mL), washed with brine (2 x 150 mL). The organic layer was dried over MgSO<sub>4</sub> and concentrated *in vacuo*. The residue was purified by silica gel column chromatography (CHCl<sub>3</sub>/MeOH/Et<sub>3</sub>N = 100/10/1) to give **4**.

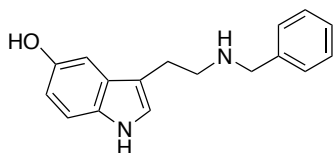

#### 3-(2-Benzylaminoethyl)-1H-indol-5-ol (**4a**).

1.52 g, 57%: Pale yellow oil: IR (CHCl<sub>3</sub>): 3296 cm<sup>-1</sup>; <sup>1</sup>H-NMR (500 MHz, CD<sub>3</sub>OD):  $\delta$  9.91 (br s, 1H), 7.20-7.23 (m, 2H), 7.13-7.18 (m, 4H), 6.92 (s, 1H), 6.91 (d,  $J = 2.3$  Hz, 1H), 6.67 (dd,  $J = 2.3, 8.6$  Hz, 1H), 3.66 (s, 2H), 3.33 (br s, 1H), 2.79-2.87 (m, 4H); <sup>13</sup>C-NMR (125 MHz, CD<sub>3</sub>OD):  $\delta$  149.9, 139.0, 131.9, 128.2, 128.0, 126.9, 123.0, 111.5, 111.3, 111.2, 102.3, 52.9, 48.8, 24.7 (three carbons are overlapped); HRMS (ESI): calcd for C<sub>17</sub>H<sub>19</sub>N<sub>2</sub>O [M+H]<sup>+</sup> 267.1497, found 267.1497.

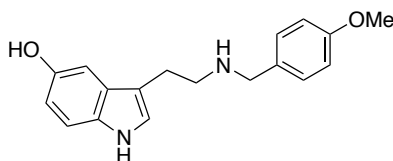

#### 3-[2-(4-methoxybenzylaminoethyl)]-1H-indol-5-ol (**4b**).

1.54 g, 52%: Colorless powder: mp 138–139 °C; IR (CHCl<sub>3</sub>): 3481 cm<sup>-1</sup>; <sup>1</sup>H-NMR (500 MHz, CD<sub>3</sub>OD):  $\delta$  7.13-7.15 (m, 3H), 6.96 (s, 1H), 6.87 (d,  $J = 2.3$  Hz, 1H), 6.80-6.82 (m, 2H), 6.65 (dd,  $J = 2.3, 8.6$  Hz, 1H), 3.72 (s, 2H), 3.70

(br s, 1H), 3.33 (s, 3H), 2.88 (s, 4H);  $^{13}\text{C}$ -NMR (125 MHz, CD<sub>3</sub>OD):  $\delta$  159.3, 149.9, 131.9, 129.9, 129.6, 127.9, 123.0, 113.6, 111.4, 111.2, 110.8, 102.2, 54.3, 52.1, 48.4, 24.4 (two carbons are overlapped); HRMS (ESI): calcd for C<sub>18</sub>H<sub>21</sub>N<sub>2</sub>O<sub>2</sub> [M+H]<sup>+</sup> 297.1603, found 297.1604.

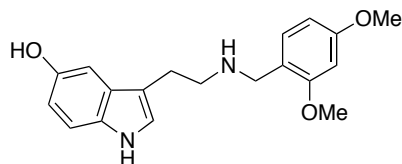

### 3-[2-(2,4-Dimethoxybenzylamino)ethyl]-1H-indol-5-ol (4c).

1.50 g, 46%: Colorless powder: mp 139—140 °C; IR (CHCl<sub>3</sub>): 3479 cm<sup>-1</sup>;  $^1\text{H}$ -NMR (500 MHz, CD<sub>3</sub>OD):  $\delta$  7.19 (t,  $J$  = 8.6 Hz, 2H), 7.09 (s, 1H), 6.85 (s, 1H), 6.70 (dd,  $J$  = 2.3, 8.6 Hz, 1H), 6.48 (dd,  $J$  = 2.3, 8.6 Hz, 1H), 6.44 (s, 1H), 4.05 (s, 2H), 3.75 (s, 3H), 3.61 (s, 3H), 3.18 (t,  $J$  = 6.9 Hz, 2H), 3.06 (t,  $J$  = 7.4 Hz, 2H);  $^{13}\text{C}$ -NMR (125 MHz, CD<sub>3</sub>OD):  $\delta$  162.7, 158.9, 150.3, 132.2, 131.9, 127.4, 124.0, 111.8, 111.6, 110.9, 107.8, 104.9, 101.9, 97.9, 54.7, 54.6, 46.7, 46.5, 21.9; HRMS (ESI): calcd for C<sub>18</sub>H<sub>21</sub>N<sub>2</sub>O<sub>2</sub> [M+H]<sup>+</sup> 313.1552, found 313.1553.

### General Procedure for the C4 Pictet–Spengler/Allylic Transposition

A mixture of **4** (5 mmol) and 3-methyl-2-butenal (0.72 mL, 7.5 mmol) in 2-propanol/Et<sub>3</sub>N (40 mL, v/v = 1/1) was heated under reflux with stirring until the complete disappearance of starting material as indicated by TLC. The mixture was cooled to rt. After addition of H<sub>2</sub>O (80 mL), the whole was extracted with AcOEt (3 x 150 mL), washed with brine (2 x 100 mL). The organic layer was dried over MgSO<sub>4</sub> and concentrated *in vacuo*. The residue was purified by silica gel column chromatography (AcOEt/hexane/Et<sub>3</sub>N = 50/10/1) to give **8**.

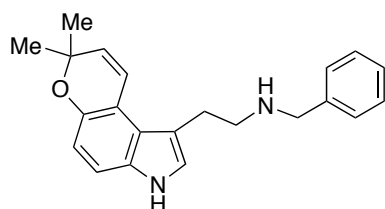

### N-Benzyl-2-(7,7-dimethyl-3,7-dihydropyrano[3,2-*e*]indol-1-yl)ethan-1-amine (8a).

1.3 g, 78%: Colorless powder: mp 110—112 °C; IR (CHCl<sub>3</sub>): 3481 cm<sup>-1</sup>;  $^1\text{H}$ -NMR (500 MHz, CD<sub>3</sub>OD):  $\delta$  7.17-7.24 (m, 5H), 7.05 (d,  $J$  = 8.6 Hz, 1H), 6.94 (s, 1H), 6.86 (d,  $J$  = 10.3 Hz, 1H), 6.56 (d,  $J$  = 8.6 Hz, 1H), 5.56 (d,  $J$  = 8.6 Hz, 1H), 3.75 (s, 3H), 3.69 (s, 2H), 2.98 (t,  $J$  = 7.5 Hz, 2H), 2.81 (t,  $J$  = 6.9 Hz, 2H), 1.34 (s, 6H);  $^{13}\text{C}$ -NMR (125 MHz, CD<sub>3</sub>OD):  $\delta$  146.1, 139.1, 133.1, 129.0, 128.2, 126.9, 124.1, 122.5, 120.2, 112.5, 112.1, 111.8, 111.2, 74.5, 52.9, 49.3, 26.8, 26.1 (four carbons are overlapped); HRMS (ESI): calcd for C<sub>22</sub>H<sub>25</sub>N<sub>2</sub>O [M+H]<sup>+</sup> 333.1967, found 333.1967.

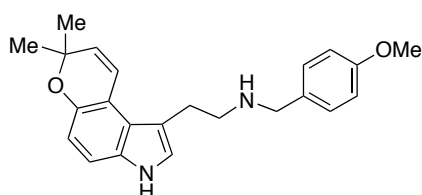

**2-(7,7-Dimethyl-3,7-dihydropyrano[3,2-*e*]indol-1-yl)-*N*-(4-methoxybenzyl)ethan-1-amine (8b).**

890 mg, 60%: Colorless powder: mp 97—100 °C; IR (CHCl<sub>3</sub>): 3481 cm<sup>-1</sup>; <sup>1</sup>H-NMR (500 MHz, CDCl<sub>3</sub>): δ 7.92 (br s, 1H), 7.20 (d, *J* = 9.2 Hz, 2H), 7.07 (d, *J* = 9.2 Hz, 1H), 6.94 (d, *J* = 2.3 Hz, 1H), 6.90 (d, *J* = 10.3 Hz, 1H), 6.83 (d, *J* = 8.6 Hz, 2H), 6.71 (d, *J* = 8.6 Hz, 1H), 5.60 (d, *J* = 9.8 Hz, 1H), 3.78 (s, 3H), 3.76 (s, 2H), 3.05 (t, *J* = 6.9 Hz, 2H), 2.95 (t, *J* = 6.9 Hz, 2H), 1.43 (s, 6H); <sup>13</sup>C-NMR (125 MHz, CDCl<sub>3</sub>): δ 158.7, 146.8, 132.6, 129.7, 129.4, 123.7, 122.9, 120.3, 114.0, 113.9, 113.2, 112.9, 111.3, 74.9, 55.4, 53.4, 49.7, 27.9, 27.3 (four carbons are overlapped); HRMS (ESI): calcd for C<sub>23</sub>H<sub>27</sub>N<sub>2</sub>O<sub>2</sub> [M+H]<sup>+</sup> 363.2073, found 363.2070.

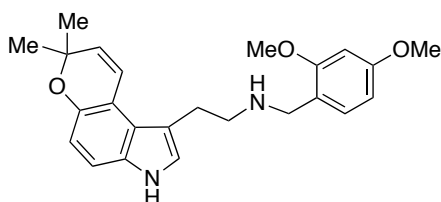

***N*-(2,4-Dimethoxybenzyl)-2-(7,7-dimethyl-3,7-dihydropyrano[3,2-*e*]indol-1-yl)ethan-1-amine (8c).**

911 mg, 46%: Colorless powder: mp 54—56 °C; IR (CHCl<sub>3</sub>): 3479, 3309, 1732, 1614, 1589 cm<sup>-1</sup>; <sup>1</sup>H-NMR (500 MHz, CDCl<sub>3</sub>): δ 8.24 (br s, 1H), 7.08 (d, *J* = 9.2 Hz, 1H), 7.04 (d, *J* = 9.2 Hz, 1H), 6.90 (s, 1H), 6.88 (d, *J* = 10.3 Hz, 1H), 6.69 (d, *J* = 8.6 Hz, 1H), 6.37-6.39 (m, 2H), 5.57 (d, *J* = 9.7 Hz, 1H), 3.77 (s, 3H), 3.76 (s, 3H), 3.65 (s, 2H), 3.05 (t, *J* = 7.2 Hz, 2H), 2.92 (t, *J* = 6.6 Hz, 2H), 2.10 (br s, 1H), 1.43 (s, 6H); <sup>13</sup>C-NMR (125 MHz, CDCl<sub>3</sub>): δ 160.2, 158.7, 146.7, 132.7, 130.5, 129.6, 123.9, 122.9, 120.6, 120.3, 113.8, 113.2, 112.8, 11.3, 103.7, 98.6, 74.9, 55.4, 55.2, 27.8, 27.3 (one carbon is overlapped); HRMS (ESI): calcd for C<sub>24</sub>H<sub>29</sub>N<sub>2</sub>O<sub>3</sub> [M+H]<sup>+</sup> 393.2178, found 393.2178.

**General Procedure for the Carbonylative Cyclization of **8** using Triphosgene, Et<sub>3</sub>N and HBr**

Triphosgene (149 mg, 0.5 mmol) was added to a mixture of **8** (1 mmol) and Et<sub>3</sub>N (0.35 mL, 2.5 mmol) in toluene (100 mL) at room temperature and the mixture was heated at 70 °C with stirring for 0.5 h. After cooling to room temperature, HBr (30% in acetic acid, 0.3 mL) was added to the mixture and heated under reflux for 0.5 h. After cooling to room temperature and addition of H<sub>2</sub>O (30 mL), the whole was extracted with AcOEt (3 x 70 mL), washed with brine (2 x 50 mL). The organic layer was dried over MgSO<sub>4</sub> and concentrated *in vacuo*. The residue was purified by silica gel column chromatography (AcOEt/hexane = 3/1) to give **9** and **12**.

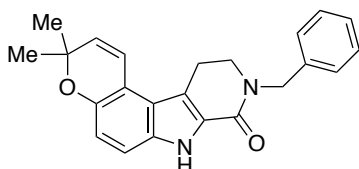

**9-Benzyl-3,3-dimethyl-7,9,10,11-tetrahydropyrano[3,2-*e*]pyrido[3,4-*b*]indol-8(3*H*)-one (9a).**

18 mg, 5%: Colorless powder: mp 254—257 °C; IR (CHCl<sub>3</sub>): 3460, 1641 cm<sup>-1</sup>; <sup>1</sup>H-NMR (500 MHz, DMSO-*d*<sub>6</sub>): δ 11.50 (br s, 1H), 7.29-7.34 (m, 4H), 7.24 (t, *J* = 6.9 Hz, 1H), 7.12 (d, *J* = 8.6 Hz, 1H), 6.75 (d, *J* = 9.8 Hz, 1H), 6.68

(d,  $J = 8.6$  Hz, 1H), 5.67 (d,  $J = 9.8$  Hz, 1H), 4.66 (s, 2H), 3.54 (t,  $J = 6.9$  Hz, 2H), 3.08 (t,  $J = 6.9$  Hz, 2H), 1.33 (s, 6H);  $^{13}\text{C-NMR}$  (125 MHz, DMSO- $d_6$ ):  $\delta$  161.0, 146.6, 138.5, 133.7, 130.4, 129.1, 128.4, 128.1, 127.7, 121.4, 119.8, 116.7, 115.5, 113.3, 113.2, 75.5, 49.1, 47.6, 27.5, 22.5 (three carbons are overlapped); HRMS (ESI): calcd for  $\text{C}_{23}\text{H}_{23}\text{N}_2\text{O}_2$   $[\text{M}+\text{H}]^+$  359.1760, found 359.1760.

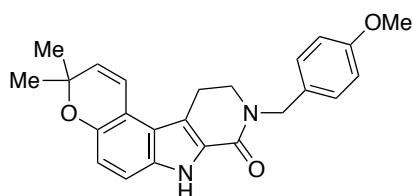

**9-(4-Methoxybenzyl)-3,3-dimethyl-7,9,10,11-tetrahydropyrano[3,2-*e*]pyrido[3,4-*b*]indol-8(3*H*)-one (9b).**

24 mg, 6%: Colorless powder: mp 186—187 °C; IR (CHCl<sub>3</sub>): 3462, 1638 cm<sup>-1</sup>;  $^1\text{H-NMR}$  (500 MHz, CDCl<sub>3</sub>):  $\delta$  9.42 (br s, 1H), 7.28 (d,  $J = 8.6$  Hz, 2H), 7.17 (d,  $J = 9.2$  Hz, 1H), 6.86 (d,  $J = 9.2$  Hz, 2H), 6.80 (d,  $J = 9.2$  Hz, 1H), 6.73 (d,  $J = 9.7$  Hz, 1H), 5.60 (d,  $J = 9.7$  Hz, 1H), 4.72 (s, 2H), 3.80 (s, 3H), 3.60 (t,  $J = 7.2$  Hz, 2H), 3.14 (t,  $J = 7.5$  Hz, 2H), 1.43 (s, 6H);  $^{13}\text{C-NMR}$  (125 MHz, CDCl<sub>3</sub>):  $\delta$  161.3, 159.1, 147.1, 133.2, 130.1, 129.6, 129.4, 128.0, 121.6, 119.6, 116.9, 116.1, 114.1, 113.6, 112.5, 75.5, 55.4, 48.9, 47.1, 27.3, 22.8 (three carbons are overlapped); HRMS (ESI): calcd for  $\text{C}_{23}\text{H}_{23}\text{N}_2\text{O}_3$   $[\text{M}+\text{H}]^+$  389.1865, found 389.1868.

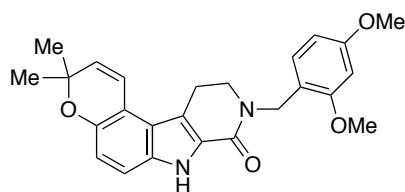

**9-(2,4-Dimethoxybenzyl)-3,3-dimethyl-7,9,10,11-tetrahydropyrano[3,2-*e*]pyrido[3,4-*b*]indol-8(3*H*)-one (9c).**

8 mg, 2%: Colorless powder: mp 209—211 °C; IR (CHCl<sub>3</sub>): 3460, 1719, 1687, 1638, 1614 cm<sup>-1</sup>;  $^1\text{H-NMR}$  (500 MHz, CDCl<sub>3</sub>):  $\delta$  9.86 (br s, 1H), 7.27 (d,  $J = 8.0$  Hz, 1H), 7.15 (d,  $J = 9.2$  Hz, 1H), 6.76 (t,  $J = 9.5$  Hz, 2H), 6.47 (d,  $J = 2.3$  Hz, 1H), 6.44 (dd,  $J = 2.3, 8.6$  Hz, 1H), 5.60 (d,  $J = 9.7$  Hz, 1H), 4.75 (s, 2H), 3.82 (s, 3H), 3.79 (s, 3H), 3.67 (t,  $J = 7.5$  Hz, 2H), 3.14 (t,  $J = 6.9$  Hz, 2H), 1.43 (s, 6H);  $^{13}\text{C-NMR}$  (125 MHz, CDCl<sub>3</sub>):  $\delta$  161.6, 160.4, 158.7, 147.0, 133.4, 130.4, 129.9, 128.3, 121.6, 119.7, 118.1, 116.8, 115.8, 113.4, 112.7, 104.3, 98.6, 75.2, 55.5, 47.5, 44.0, 27.4, 22.9 (two carbons are overlapped); HRMS (ESI): calcd for  $\text{C}_{23}\text{H}_{23}\text{N}_2\text{O}_4$   $[\text{M}+\text{H}]^+$  419.1971, found 419.1973.

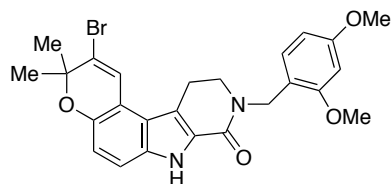

**2-Bromo-9-(2,4-dimethoxybenzyl)-3,3-dimethyl-7,9,10,11-tetrahydropyrano[3,2-*e*]pyrido[3,4-*b*]indol-8(3*H*)-one (12)**

58 mg, 12%: Colorless powder: mp 189—191 °C; IR (CHCl<sub>3</sub>): 3207, 1636 cm<sup>-1</sup>;  $^1\text{H-NMR}$  (500 MHz, CDCl<sub>3</sub>):  $\delta$  9.98 (br s, 1H), 7.27 (d,  $J = 8.6$  Hz, 1H), 7.19 (d,  $J = 8.6$  Hz, 1H), 7.09 (s, 1H), 6.77 (d,  $J = 9.2$  Hz, 1H), 6.48 (d,  $J = 2.3$  Hz, 1H), 6.45 (dd,  $J = 2.6, 8.1$  Hz, 1H), 4.75 (s, 2H), 3.82 (s, 3H), 3.80 (s, 3H), 3.69 (t,  $J = 7.6$  Hz, 2H), 3.14 (t,  $J =$

7.4 Hz, 2H), 1.54 (s, 6H);  $^{13}\text{C-NMR}$  (125 MHz,  $\text{CDCl}_3$ ):  $\delta$  161.4, 160.4, 158.7, 145.7, 133.6, 130.5, 128.6, 124.2, 123.2, 120.7, 118.0, 116.5, 115.6, 114.1, 113.2, 104.3, 98.6, 79.4, 55.5, 47.5, 44.1, 26.0, 22.7 (two carbons are overlapped); HRMS (ESI): calcd for  $\text{C}_{25}\text{H}_{25}\text{BrN}_2\text{NaO}_4$   $[\text{M}+\text{Na}]^+$  519.0895, 521.0875, found 519.0896, 521.0876.

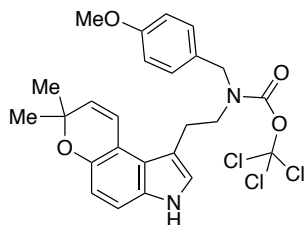

**Trichloromethyl (2-(7,7-dimethyl-3,7-dihydropyrano[3,2-*e*]indol-1-yl)ethyl)(4-methoxybenzyl)carbamate (13b)**

Triphosgene (312 mg, 1.05 mmol) was added to a mixture of **8b** (1 mmol) and  $\text{Et}_3\text{N}$  (0.35 mL, 2.5 mmol) in THF (40 mL) at room temperature and the mixture was stirring for 0.5 h. After addition of  $\text{H}_2\text{O}$  (20 mL), the whole was extracted with  $\text{AcOEt}$  (3 x 50 mL), washed with brine (2 x 30 mL). The organic layer was dried over  $\text{MgSO}_4$  and concentrated *in vacuo*. The residue was purified by silica gel column chromatography ( $\text{AcOEt}/\text{hexane} = 1/10$ ) to give **13b** (460 mg, 88%) as a colorless powder.

460 mg, 88%: Colorless powder: mp 83–84 °C; IR ( $\text{CHCl}_3$ ): 3477, 1722  $\text{cm}^{-1}$ ;  $^1\text{H-NMR}$  (500 MHz,  $\text{CDCl}_3$ ):  $\delta$  7.87, 7.91 (2 br s, 1H), 7.08–7.14 (m, 3H), 6.92 (s, 1H), 6.82–6.89 (m, 3H), 6.73 (dd,  $J = 6.9, 8.6$  Hz, 1H), 5.64 (d,  $J = 10.3$  Hz, 1H), 4.49 (s, 1H), 4.36 (s, 1H), 3.77, 3.78 (2s, 3H), 3.64 (t,  $J = 8.0$  Hz, 1H), 3.57 (t,  $J = 7.5$  Hz, 1H), 3.13 (t,  $J = 8.0$  Hz, 1H), 3.10 (t,  $J = 7.5$  Hz, 1H), 1.45 (s, 3H), 1.43 (s, 3H);  $^{13}\text{C-NMR}$  (125 MHz,  $\text{CDCl}_3$ ):  $\delta$  159.5, 159.5, 150.2, 149.3, 147.0, 146.9, 132.4, 130.2, 129.9, 128.8, 127.9, 127.5, 124.1, 124.0, 122.6, 122.5, 119.8, 119.9, 114.3, 114.2, 113.3, 113.2, 112.2, 112.0, 111.6, 111.4, 75.0, 55.4, 54.8, 52.6, 50.8, 50.5, 27.3, 26.4, 25.0 (rotamers were observed); HRMS (ESI): calcd for  $\text{C}_{25}\text{H}_{25}\text{Cl}_3\text{N}_2\text{O}_4$   $[\text{M}+\text{H}]^+$  523.0958, 525.0929, found 523.0953, 525.0925.

**Procedure for the C2 Pictet–Spengler Reaction of 13b**

A solution of compound **13b** (52 mg, 0.1 mmol) in DMSO was heated at 100 °C for 0.5 h. After removal of  $\text{MeCN}$  by evaporation, the resultant mixture was purified by silica gel column chromatography ( $\text{AcOEt}/\text{hexane} = 3/1–5/1$ ) to give **9b** (33 mg, 86%) as a colorless powder.

**General Procedure for the the Interrupted Phosgene Cyclization/Bischler–Napieralski-type Cyclization of 8**

Triphosgene (312 mg, 1.05 mmol) was added to a mixture of **8** (1 mmol) and  $\text{Et}_3\text{N}$  (0.35 mL, 2.5 mmol) in THF (40 mL) was added at room temperature and the mixture was stirring for 0.5 h. After addition of  $\text{H}_2\text{O}$  (20 mL), the whole was extracted with  $\text{AcOEt}$  (3 x 50 mL), washed with brine (2 x 30 mL). The organic layer was dried over  $\text{MgSO}_4$  and concentrated *in vacuo*. The crude residue was used without further purification. A solution of the crude in DMSO was heated at 100 °C for 0.5 h. After removal of  $\text{MeCN}$  by evaporation, the resultant mixture was purified by silica gel column chromatography ( $\text{AcOEt}/\text{hexane} = 3/1–5/1$ ) to give **9**.

**9a**: 280 mg, 78%

**9b**: 253 mg, 65%

**9c**: 242 mg, 58%

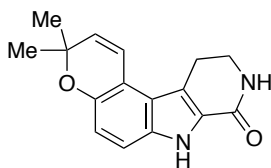

**3,3-Dimethyl-7,9,10,11-tetrahydropyrano[3,2-*e*]pyrido[3,4-*b*]indol-8(3*H*)-one (10).**

To a solution of compound **9c** (42 mg, 0.1 mmol) in toluene was *p*-toluenesulfonic acid (69 mg, 0.4 mmol) and heated at 100 °C for 16 h. After removal of toluene by evaporation, the resultant mixture was purified by silica gel column chromatography (AcOEt/hexane/CHCl<sub>3</sub>/MeOH/28% NH<sub>3</sub> = 50/100/50/50/1) to give **10** (18 mg, 67%) as a colorless powder.

18 mg, 67%: Colorless powder: mp 149–150 °C; IR (CHCl<sub>3</sub>): 3460, 3421, 3229, 1719, 1663 cm<sup>-1</sup>; <sup>1</sup>H-NMR (500 MHz, CDCl<sub>3</sub>): δ 9.09 (br s, 1H), 7.17 (d, *J* = 8.6 Hz, 1H), 6.84 (d, *J* = 9.2 Hz, 1H), 6.80 (d, *J* = 8.6 Hz, 1H), 5.73 (br s, 1H), 5.64 (d, *J* = 10.3 Hz, 1H), 3.69–3.71 (m, 2H), 3.21 (t, *J* = 6.9 Hz, 2H), 1.45 (s, 6H); <sup>13</sup>C-NMR (125 MHz, CDCl<sub>3</sub>): δ 163.0, 147.3, 133.0, 130.3, 127.2, 121.7, 119.5, 118.7, 116.6, 113.7, 112.5, 75.5, 42.2, 27.4, 23.0 (one carbon is overlapped); HRMS (ESI): calcd for C<sub>16</sub>H<sub>17</sub>N<sub>3</sub>O<sub>2</sub> [M+H]<sup>+</sup> 269.1290, found 269.1289.

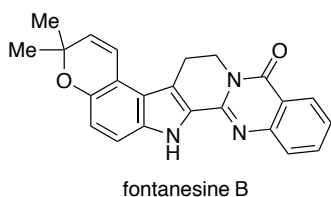

**4,4-Dimethyl-4,7,8,16-tetrahydro-10*H*-pyrano[3'',2'':4',5']indolo[2',3':3,4]pyrido[2,1-*b*]quinazolin-10-one (Fontanesine B, 2).**

To a solution of compound **10** (13 mg, 0.05 mmol) and anthranilic acid (8 mg, 0.06 mmol) in toluene was added POCl<sub>3</sub> (18 mg, 0.12 mmol) at room temperature and the mixture was heated at 100 °C for 2 h. After removal of toluene by evaporation, the resultant mixture was purified by silica gel column chromatography (AcOEt/CHCl<sub>3</sub> = 5/1) to give **2** (14 mg, 73%) as a pale yellow powder.

pale yellow powder; mp 261–263 °C; IR (CHCl<sub>3</sub>): 3396, 1668, 1660 cm<sup>-1</sup>; <sup>1</sup>H-NMR (500 MHz, DMSO-*d*<sub>6</sub>): δ 11.71 (br s, 1H), 8.12 (d, *J* = 8.0 Hz, 1H), 7.77 (td, *J* = 1.2, 6.5 Hz, 1H), 7.64 (d, *J* = 8.1 Hz, 1H), 7.43 (td, *J* = 1.2, 7.4 Hz, 1H), 7.12 (s, 1H), 6.93 (s, 1H), 6.53 (d, *J* = 9.7 Hz, 1H), 5.81 (d, *J* = 9.8 Hz, 1H), 4.38 (t, *J* = 6.9 Hz, 2H), 3.06 (t, *J* = 7.5 Hz, 2H), 1.34 (s, 6H); <sup>13</sup>C-NMR (125 MHz, DMSO-*d*<sub>6</sub>): δ 161.1, 148.0, 146.8, 145.8, 135.0, 130.7, 128.5, 127.1, 127.0, 126.5, 121.5, 121.2, 119.8, 117.1, 116.1, 113.3, 113.2, 75.6, 41.1, 27.5, 21.3; HRMS (ESI): calcd for C<sub>23</sub>H<sub>20</sub>N<sub>4</sub>O<sub>2</sub> [M+H]<sup>+</sup> 370.1556, found 370.1557.

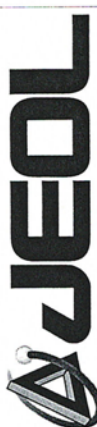

```

Filename = 201110501-4.jdf
Experiment = single_pulse.exe2
Sample_id = S8639004
Date_ = 5-NOV-2018 17:18:31
Revision_time = 5-NOV-2018 17:53:31
Current_time = 5-NOV-2018 17:53:35
Content = single_pulse
Date_ = 5-NOV-2018 17:53:35
Dia_title = 13107
Dimensions = X (ppm)
Site = MCA 500
Spectrometer = MZRHA_NMR
Field_strength = 11.62526421(T) (500)M
X_domain = 11.62526421(T)
X_freq = 99.13191398(MHz)
X_points = 45384
X_resolution = 2.666198(Hz)
X_sweep = 2.28677563(MHz)
X_prescans = 1
Irr_domain = IR 13191398(MHz)
Irr_offset = 5(ppm)
Tri_domain = IR 13191398(MHz)
Tri_offset = 5(ppm)
Clipped = FALSE
Spectrum = 16
Sols = 16
Total_scans = 16
X_90_width = 12.7(us)
X_acc_time = 1.76422912(s)
X_acq = 3.31(DS)
X_pulse = 6.35(us)
X_mode = OFF
X_waveform = OFF
Dance_preset = FALSE
Dance_preset = 10
Mhz = 500
Relaxation_delay = 5(s)
Relaxation_time = 22.5(s)
Temperature = 22.5(C)
  
```

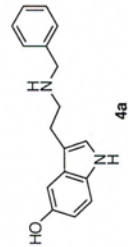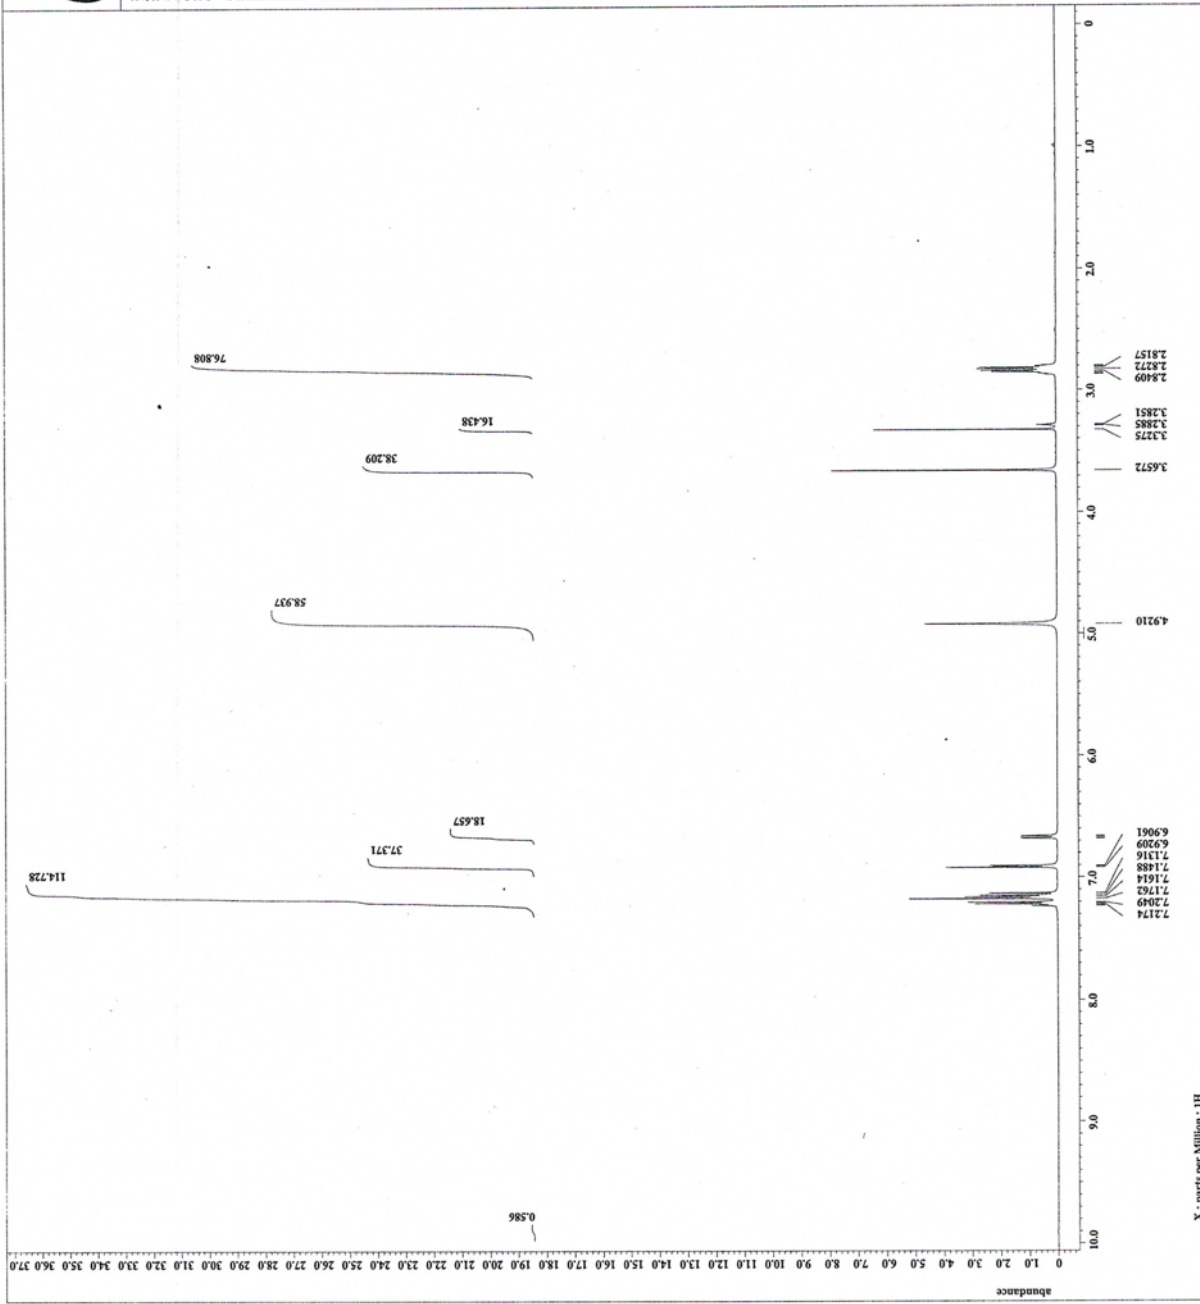

X : parts per Million : 1H









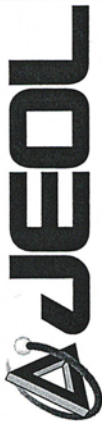

Filename = 2016102503-4\_2of  
Experiment = single\_pulse.exe2  
Sample\_id = S866577  
Sample\_date = 24-OCT-2018 16:26:22  
Creation\_time = 24-OCT-2018 17:23:46  
Revision\_time = 24-OCT-2018 17:23:46  
Current\_time = 24-OCT-2018 17:23:50  
Content = single\_pulse  
Date\_acq = 20181025  
Date\_time = 11:07  
Disk\_name = 1107P20K  
Disk\_size = 1107  
Dimensions = X ppm  
Site = ECA 500  
Spectrometer = DELTA1\_00R  
Field\_strength = 11.62926421[G] (500[M  
X\_freq = 1H (42529218)  
X\_nucl = 1H (42529218)  
X\_freq2 = 495.13191398[MHz]  
X\_nucl2 = 133M  
X\_solvent = 133M  
X\_prescans = 1  
X\_resolution = 5.66848[Hz]  
X\_sweep = 9.28677563[MHz]  
Irr\_domain = 1H  
Irr\_freq = 133.191398[MHz]  
Irr\_offset = 5[Dppm]  
Tri\_domain = 1H  
Tri\_freq = 133.191398[MHz]  
Tri\_offset = 5[Dppm]  
Clipped = FALSE  
Spectrum\_return = 16  
Total\_scans = 16  
X\_90\_width = 12.7[us]  
X\_90\_time = 1.76422912[us]  
X\_acq\_time = 1.76422912[us]  
X\_wait = 1.00[us]  
X\_wait2 = 3.00[us]  
X\_pulse = 6.32[us]  
X\_pulse2 = 6.32[us]  
Tri\_mode = Off  
Tri\_wave = Off  
Dance\_preset = FALSE  
Dance\_preset\_time = 1.00[us]  
Relaxation\_delay = 30  
Relaxation\_delay2 = 30  
Relaxation\_delay3 = 5[us]  
Relaxation\_delay4 = 5[us]  
Acquisition\_time = 21.81627[us]  
Temp\_set = 21.81627

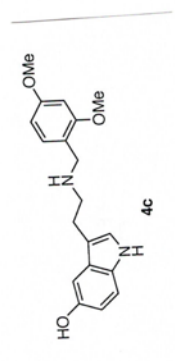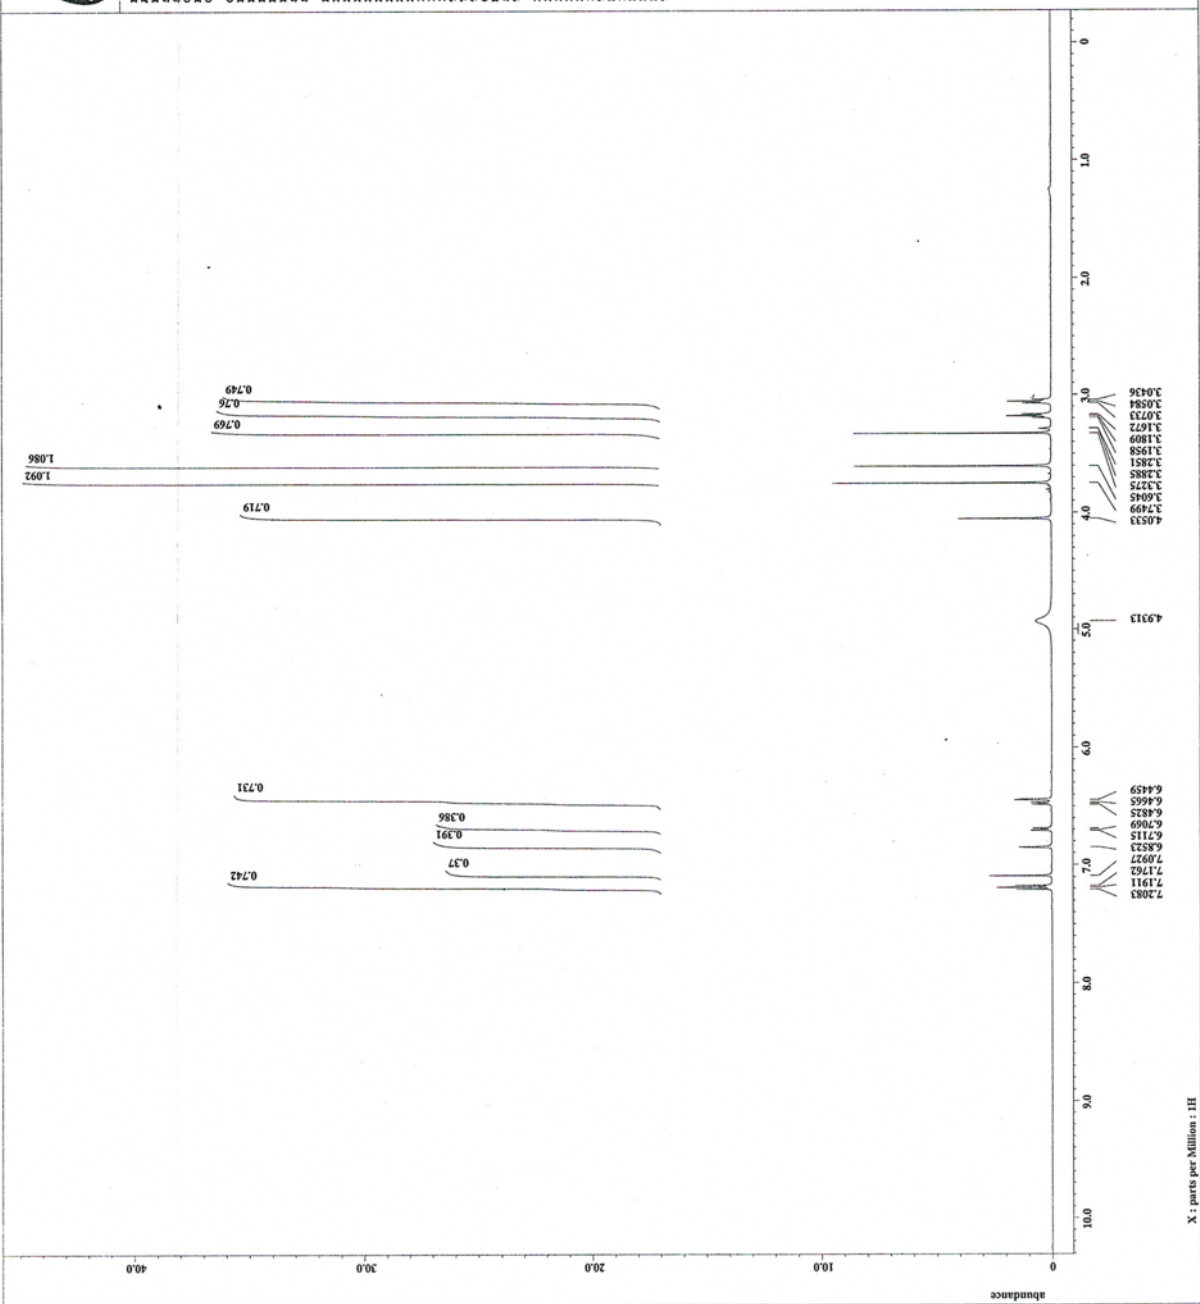

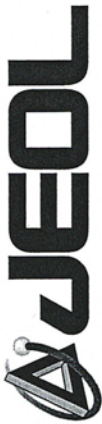

```

Filename      = 2018102502-9_1d2
Experiment    = single_pulse_dec
Sample_ID     = 8863102
Date_Exp     = 25-OCT-2018 08:57:10
Creation_Time = 25-OCT-2018 09:25:01
Revision_Time = 25-OCT-2018 09:25:01
Current_Time  = 25-OCT-2018 09:25:14

Content      = single pulse decouple
Date_Recd   = 26214
Date_Exp    = 13C
Dimensions  = X[1]
Site        = INOVA_300
Spectrometer = INOVA_300
Pulse_Prog  = zgpg30
Field_Strength = 125.7624117 [T] (500[M]
Gamma       = 13C
X1          = 13C
X2          = 13C
X3          = 13C
X4          = 13C
X5          = 13C
X6          = 13C
X7          = 13C
X8          = 13C
X9          = 13C
X10         = 13C
X11         = 13C
X12         = 13C
X13         = 13C
X14         = 13C
X15         = 13C
X16         = 13C
X17         = 13C
X18         = 13C
X19         = 13C
X20         = 13C
X21         = 13C
X22         = 13C
X23         = 13C
X24         = 13C
X25         = 13C
X26         = 13C
X27         = 13C
X28         = 13C
X29         = 13C
X30         = 13C
X31         = 13C
X32         = 13C
X33         = 13C
X34         = 13C
X35         = 13C
X36         = 13C
X37         = 13C
X38         = 13C
X39         = 13C
X40         = 13C
X41         = 13C
X42         = 13C
X43         = 13C
X44         = 13C
X45         = 13C
X46         = 13C
X47         = 13C
X48         = 13C
X49         = 13C
X50         = 13C
X51         = 13C
X52         = 13C
X53         = 13C
X54         = 13C
X55         = 13C
X56         = 13C
X57         = 13C
X58         = 13C
X59         = 13C
X60         = 13C
X61         = 13C
X62         = 13C
X63         = 13C
X64         = 13C
X65         = 13C
X66         = 13C
X67         = 13C
X68         = 13C
X69         = 13C
X70         = 13C
X71         = 13C
X72         = 13C
X73         = 13C
X74         = 13C
X75         = 13C
X76         = 13C
X77         = 13C
X78         = 13C
X79         = 13C
X80         = 13C
X81         = 13C
X82         = 13C
X83         = 13C
X84         = 13C
X85         = 13C
X86         = 13C
X87         = 13C
X88         = 13C
X89         = 13C
X90         = 13C
X91         = 13C
X92         = 13C
X93         = 13C
X94         = 13C
X95         = 13C
X96         = 13C
X97         = 13C
X98         = 13C
X99         = 13C
X100        = 13C
X101        = 13C
X102        = 13C
X103        = 13C
X104        = 13C
X105        = 13C
X106        = 13C
X107        = 13C
X108        = 13C
X109        = 13C
X110        = 13C
X111        = 13C
X112        = 13C
X113        = 13C
X114        = 13C
X115        = 13C
X116        = 13C
X117        = 13C
X118        = 13C
X119        = 13C
X120        = 13C
X121        = 13C
X122        = 13C
X123        = 13C
X124        = 13C
X125        = 13C
X126        = 13C
X127        = 13C
X128        = 13C
X129        = 13C
X130        = 13C
X131        = 13C
X132        = 13C
X133        = 13C
X134        = 13C
X135        = 13C
X136        = 13C
X137        = 13C
X138        = 13C
X139        = 13C
X140        = 13C
X141        = 13C
X142        = 13C
X143        = 13C
X144        = 13C
X145        = 13C
X146        = 13C
X147        = 13C
X148        = 13C
X149        = 13C
X150        = 13C
X151        = 13C
X152        = 13C
X153        = 13C
X154        = 13C
X155        = 13C
X156        = 13C
X157        = 13C
X158        = 13C
X159        = 13C
X160        = 13C
X161        = 13C
X162        = 13C
X163        = 13C
X164        = 13C
X165        = 13C
X166        = 13C
X167        = 13C
X168        = 13C
X169        = 13C
X170        = 13C
X171        = 13C
X172        = 13C
X173        = 13C
X174        = 13C
X175        = 13C
X176        = 13C
X177        = 13C
X178        = 13C
X179        = 13C
X180        = 13C
X181        = 13C
X182        = 13C
X183        = 13C
X184        = 13C
X185        = 13C
X186        = 13C
X187        = 13C
X188        = 13C
X189        = 13C
X190        = 13C
X191        = 13C
X192        = 13C
X193        = 13C
X194        = 13C
X195        = 13C
X196        = 13C
X197        = 13C
X198        = 13C
X199        = 13C
X200        = 13C
X201        = 13C
X202        = 13C
X203        = 13C
X204        = 13C
X205        = 13C
X206        = 13C
X207        = 13C
X208        = 13C
X209        = 13C
X210        = 13C
X211        = 13C
X212        = 13C
X213        = 13C
X214        = 13C
X215        = 13C
X216        = 13C
X217        = 13C
X218        = 13C
X219        = 13C
X220        = 13C
X221        = 13C
X222        = 13C
X223        = 13C
X224        = 13C
X225        = 13C
X226        = 13C
X227        = 13C
X228        = 13C
X229        = 13C
X230        = 13C
X231        = 13C
X232        = 13C
X233        = 13C
X234        = 13C
X235        = 13C
X236        = 13C
X237        = 13C
X238        = 13C
X239        = 13C
X240        = 13C
X241        = 13C
X242        = 13C
X243        = 13C
X244        = 13C
X245        = 13C
X246        = 13C
X247        = 13C
X248        = 13C
X249        = 13C
X250        = 13C
X251        = 13C
X252        = 13C
X253        = 13C
X254        = 13C
X255        = 13C
X256        = 13C
X257        = 13C
X258        = 13C
X259        = 13C
X260        = 13C
X261        = 13C
X262        = 13C
X263        = 13C
X264        = 13C
X265        = 13C
X266        = 13C
X267        = 13C
X268        = 13C
X269        = 13C
X270        = 13C
X271        = 13C
X272        = 13C
X273        = 13C
X274        = 13C
X275        = 13C
X276        = 13C
X277        = 13C
X278        = 13C
X279        = 13C
X280        = 13C
X281        = 13C
X282        = 13C
X283        = 13C
X284        = 13C
X285        = 13C
X286        = 13C
X287        = 13C
X288        = 13C
X289        = 13C
X290        = 13C
X291        = 13C
X292        = 13C
X293        = 13C
X294        = 13C
X295        = 13C
X296        = 13C
X297        = 13C
X298        = 13C
X299        = 13C
X300        = 13C
X301        = 13C
X302        = 13C
X303        = 13C
X304        = 13C
X305        = 13C
X306        = 13C
X307        = 13C
X308        = 13C
X309        = 13C
X310        = 13C
X311        = 13C
X312        = 13C
X313        = 13C
X314        = 13C
X315        = 13C
X316        = 13C
X317        = 13C
X318        = 13C
X319        = 13C
X320        = 13C
X321        = 13C
X322        = 13C
X323        = 13C
X324        = 13C
X325        = 13C
X326        = 13C
X327        = 13C
X328        = 13C
X329        = 13C
X330        = 13C
X331        = 13C
X332        = 13C
X333        = 13C
X334        = 13C
X335        = 13C
X336        = 13C
X337        = 13C
X338        = 13C
X339        = 13C
X340        = 13C
X341        = 13C
X342        = 13C
X343        = 13C
X344        = 13C
X345        = 13C
X346        = 13C
X347        = 13C
X348        = 13C
X349        = 13C
X350        = 13C
X351        = 13C
X352        = 13C
X353        = 13C
X354        = 13C
X355        = 13C
X356        = 13C
X357        = 13C
X358        = 13C
X359        = 13C
X360        = 13C
X361        = 13C
X362        = 13C
X363        = 13C
X364        = 13C
X365        = 13C
X366        = 13C
X367        = 13C
X368        = 13C
X369        = 13C
X370        = 13C
X371        = 13C
X372        = 13C
X373        = 13C
X374        = 13C
X375        = 13C
X376        = 13C
X377        = 13C
X378        = 13C
X379        = 13C
X380        = 13C
X381        = 13C
X382        = 13C
X383        = 13C
X384        = 13C
X385        = 13C
X386        = 13C
X387        = 13C
X388        = 13C
X389        = 13C
X390        = 13C
X391        = 13C
X392        = 13C
X393        = 13C
X394        = 13C
X395        = 13C
X396        = 13C
X397        = 13C
X398        = 13C
X399        = 13C
X400        = 13C
X401        = 13C
X402        = 13C
X403        = 13C
X404        = 13C
X405        = 13C
X406        = 13C
X407        = 13C
X408        = 13C
X409        = 13C
X410        = 13C
X411        = 13C
X412        = 13C
X413        = 13C
X414        = 13C
X415        = 13C
X416        = 13C
X417        = 13C
X418        = 13C
X419        = 13C
X420        = 13C
X421        = 13C
X422        = 13C
X423        = 13C
X424        = 13C
X425        = 13C
X426        = 13C
X427        = 13C
X428        = 13C
X429        = 13C
X430        = 13C
X431        = 13C
X432        = 13C
X433        = 13C
X434        = 13C
X435        = 13C
X436        = 13C
X437        = 13C
X438        = 13C
X439        = 13C
X440        = 13C
X441        = 13C
X442        = 13C
X443        = 13C
X444        = 13C
X445        = 13C
X446        = 13C
X447        = 13C
X448        = 13C
X449        = 13C
X450        = 13C
X451        = 13C
X452        = 13C
X453        = 13C
X454        = 13C
X455        = 13C
X456        = 13C
X457        = 13C
X458        = 13C
X459        = 13C
X460        = 13C
X461        = 13C
X462        = 13C
X463        = 13C
X464        = 13C
X465        = 13C
X466        = 13C
X467        = 13C
X468        = 13C
X469        = 13C
X470        = 13C
X471        = 13C
X472        = 13C
X473        = 13C
X474        = 13C
X475        = 13C
X476        = 13C
X477        = 13C
X478        = 13C
X479        = 13C
X480        = 13C
X481        = 13C
X482        = 13C
X483        = 13C
X484        = 13C
X485        = 13C
X486        = 13C
X487        = 13C
X488        = 13C
X489        = 13C
X490        = 13C
X491        = 13C
X492        = 13C
X493        = 13C
X494        = 13C
X495        = 13C
X496        = 13C
X497        = 13C
X498        = 13C
X499        = 13C
X500        = 13C
X501        = 13C
X502        = 13C
X503        = 13C
X504        = 13C
X505        = 13C
X506        = 13C
X507        = 13C
X508        = 13C
X509        = 13C
X510        = 13C
X511        = 13C
X512        = 13C
X513        = 13C
X514        = 13C
X515        = 13C
X516        = 13C
X517        = 13C
X518        = 13C
X519        = 13C
X520        = 13C
X521        = 13C
X522        = 13C
X523        = 13C
X524        = 13C
X525        = 13C
X526        = 13C
X527        = 13C
X528        = 13C
X529        = 13C
X530        = 13C
X531        = 13C
X532        = 13C
X533        = 13C
X534        = 13C
X535        = 13C
X536        = 13C
X537        = 13C
X538        = 13C
X539        = 13C
X540        = 13C
X541        = 13C
X542        = 13C
X543        = 13C
X544        = 13C
X545        = 13C
X546        = 13C
X547        = 13C
X548        = 13C
X549        = 13C
X550        = 13C
X551        = 13C
X552        = 13C
X553        = 13C
X554        = 13C
X555        = 13C
X556        = 13C
X557        = 13C
X558        = 13C
X559        = 13C
X560        = 13C
X561        = 13C
X562        = 13C
X563        = 13C
X564        = 13C
X565        = 13C
X566        = 13C
X567        = 13C
X568        = 13C
X569        = 13C
X570        = 13C
X571        = 13C
X572        = 13C
X573        = 13C
X574        = 13C
X575        = 13C
X576        = 13C
X577        = 13C
X578        = 13C
X579        = 13C
X580        = 13C
X581        = 13C
X582        = 13C
X583        = 13C
X584        = 13C
X585        = 13C
X586        = 13C
X587        = 13C
X588        = 13C
X589        = 13C
X590        = 13C
X591        = 13C
X592        = 13C
X593        = 13C
X594        = 13C
X595        = 13C
X596        = 13C
X597        = 13C
X598        = 13C
X599        = 13C
X600        = 13C
X601        = 13C
X602        = 13C
X603        = 13C
X604        = 13C
X605        = 13C
X606        = 13C
X607        = 13C
X608        = 13C
X609        = 13C
X610        = 13C
X611        = 13C
X612        = 13C
X613        = 13C
X614        = 13C
X615        = 13C
X616        = 13C
X617        = 13C
X618        = 13C
X619        = 13C
X620        = 13C
X621        = 13C
X622        = 13C
X623        = 13C
X624        = 13C
X625        = 13C
X626        = 13C
X627        = 13C
X628        = 13C
X629        = 13C
X630        = 13C
X631        = 13C
X632        = 13C
X633        = 13C
X634        = 13C
X635        = 13C
X636        = 13C
X637        = 13C
X638        = 13C
X639        = 13C
X640        = 13C
X641        = 13C
X642        = 13C
X643        = 13C
X644        = 13C
X645        = 13C
X646        = 13C
X647        = 13C
X648        = 13C
X649        = 13C
X650        = 13C
X651        = 13C
X652        = 13C
X653        = 13C
X654        = 13C
X655        = 13C
X656        = 13C
X657        = 13C
X658        = 13C
X659        = 13C
X660        = 13C
X661        = 13C
X662        = 13C
X663        = 13C
X664        = 13C
X665        = 13C
X666        = 13C
X667        = 13C
X668        = 13C
X669        = 13C
X670        = 13C
X671        = 13C
X672        = 13C
X673        = 13C
X674        = 13C
X675        = 13C
X676        = 13C
X677        = 13C
X678        = 13C
X679        = 13C
X680        = 13C
X681        = 13C
X682        = 13C
X683        = 13C
X684        = 13C
X685        = 13C
X686        = 13C
X687        = 13C
X688        = 13C
X689        = 13C
X690        = 13C
X691        = 13C
X692        = 13C
X693        = 13C
X694        = 13C
X695        = 13C
X696        = 13C
X697        = 13C
X698        = 13C
X699        = 13C
X700        = 13C
X701        = 13C
X702        = 13C
X703        = 13C
X704        = 13C
X705        = 13C
X706        = 13C
X707        = 13C
X708        = 13C
X709        = 13C
X710        = 13C
X711        = 13C
X712        = 13C
X713        = 13C
X714        = 13C
X715        = 13C
X716        = 13C
X717        = 13C
X718        = 13C
X719        = 13C
X720        = 13C
X721        = 13C
X722        = 13C
X723        = 13C
X724        = 13C
X725        = 13C
X726        = 13C
X727        = 13C
X728        = 13C
X729        = 13C
X730        = 13C
X731        = 13C
X732        = 13C
X733        = 13C
X734        = 13C
X735        = 13C
X736        = 13C
X737        = 13C
X738        = 13C
X739        = 13C
X740        = 13C
X741        = 13C
X742        = 13C
X743        = 13C
X744        = 13C
X745        = 13C
X746        = 13C
X747        = 13C
X748        = 13C
X749        = 13C
X750        = 13C
X751        = 13C
X752        = 13C
X753        = 13C
X754        = 13C
X755        = 13C
X756        = 13C
X757        = 13C
X758        = 13C
X759        = 13C
X760        = 13C
X761        = 13C
X762        = 13C
X763        = 13C
X764        = 13C
X765        = 13C
X766        = 13C
X767        = 13C
X768        = 13C
X769        = 13C
X770        = 13C
X771        = 13C
X772        = 13C
X773        = 13C
X774        = 13C
X775        = 13C
X776        = 13C
X777        = 13C
X778        = 13C
X779        = 13C
X780        = 13C
X781        = 13C
X782        = 13C
X783        = 13C
X784        = 13C
X785        = 13C
X786        = 13C
X787        = 13C
X788        = 13C
X789        = 13C
X790        = 13C
X791        = 13C
X792        = 13C
X793        = 13C
X794        = 13C
X795        = 13C
X796        = 13C
X797        = 13C
X798        = 13C
X799        = 13C
X800        = 13C
X801        = 13C
X802        = 13C
X803        = 13C
X804        = 13C
X805        = 13C
X806        = 13C
X807        = 13C
X808        = 13C
X809        = 13C
X810        = 13C
X811        = 13C
X812        = 13C
X813        = 13C
X814        = 13C
X815        = 13C
X816        = 13C
X817        = 13C
X818        = 13C
X819        = 13C
X820        = 13C
X821        = 13C
X822        = 13C
X823        = 13C
X824        = 13C
X825        = 13C
X826        = 13C
X827        = 13C
X828        = 13C
X829        = 13C
X830        = 13C
X831        = 13C
X832        = 13C
X833        = 13C
X834        = 13C
X835        = 13C
X836        = 13C
X837        = 13C
X838        = 13C
X839        = 13C
X840        = 13C
X841        = 13C
X842        = 13C
X843        = 13C
X844        = 13C
X845        = 13C
X846        = 13C
X847        = 13C
X848        = 13C
X849        = 13C
X850        = 13C
X851        = 13C
X852        = 13C
X853        = 13C
X854        = 13C
X855        = 13C
X856        = 13C
X857        = 13C
X858        = 13C
X859        = 13C
X860        = 13C
X861        = 13C
X862        = 13C
X863        = 13C
X864        = 13C
X865        = 13C
X866        = 13C
X867        = 13C
X868        = 13C
X869        = 13C
X870        = 13C
X871        = 13C
X872        = 13C
X873        = 13C
X874        = 13C
X875        = 13C
X876        = 13C
X877        = 13C
X878        = 13C
X879        = 13C
X880        = 13C
X881        = 13C
X882        = 13C
X883        = 13C
X884        = 13C
X885        = 13C
X886        = 13C
X887        = 13C
X888        = 13C
X889        = 13C
X890        = 13C
X891        = 13C
X892        = 13C
X893        = 13C
X894        = 13C
X895        = 13C
X896        = 13C
X897        = 13C
X898        = 13C
X899        = 13C
X900        = 13C
X901        = 13C
X902        = 13C
X903        = 13C
X904        = 13C
X905        = 13C
X906        = 13C
X907        = 13C
X908        = 13C
X909        = 13C
X910        = 13C
X911        = 13C
X912        = 13C
X913        = 13C
X914        = 13C
X915        = 13C
X916        = 13C
X917        = 13C
X918        = 13C
X919        = 13C
X920        = 13C
X921        = 13C
X922        = 13C
X923        = 13C
X924        = 13C
X925        = 13C
X926        = 13C
X927        = 13C
X928        = 13C
X929        = 13C
X930        = 13C
X931        = 13C
X932        = 13C
X933        = 13C
X934        = 13C
X935        = 13C
X936        = 13C
X937        = 13C
X938        = 13C
X939        = 13C
X940        = 13C
X941        = 13C
X942        = 13C
X943        = 13C
X944        = 13C
X945        = 13C
X946        = 13C
X947        = 13C
X948        = 13C
X949        = 13C
X950        = 13C
X951        = 13C
X952        = 13C
X953        = 13C
X954        = 13C
X955        = 13C
X956        = 13C
X957        = 13C
X958        = 13C
X959        = 13C
X960        = 13C
X961        = 13C
X962        = 13C
X963        = 13C
X964        = 13C
X965        = 13C
X966        = 13C
X967        = 13C
X968        = 13C
X969        = 13C
X970        = 13C
X971        = 13C
X972        = 13C
X973        = 13C
X974        = 13C
X975        = 13C
X976        = 13C
X977        = 13C
X978        = 13C
X979        = 13C
X980        = 13C
X981        = 13C
X982        = 13C
X983        = 13C
X984        = 13C
X985        = 13C
X986        = 13C
X987        = 13C
X988        = 13C
X989        = 13C
X990        = 13C
X991        = 13C
X992        = 13C
X993        = 13C
X994        = 13C
X995        = 13C
X996        = 13C
X997        = 13C
X998        = 13C
X999        = 13C
X1000       = 13C
  
```

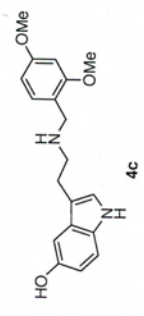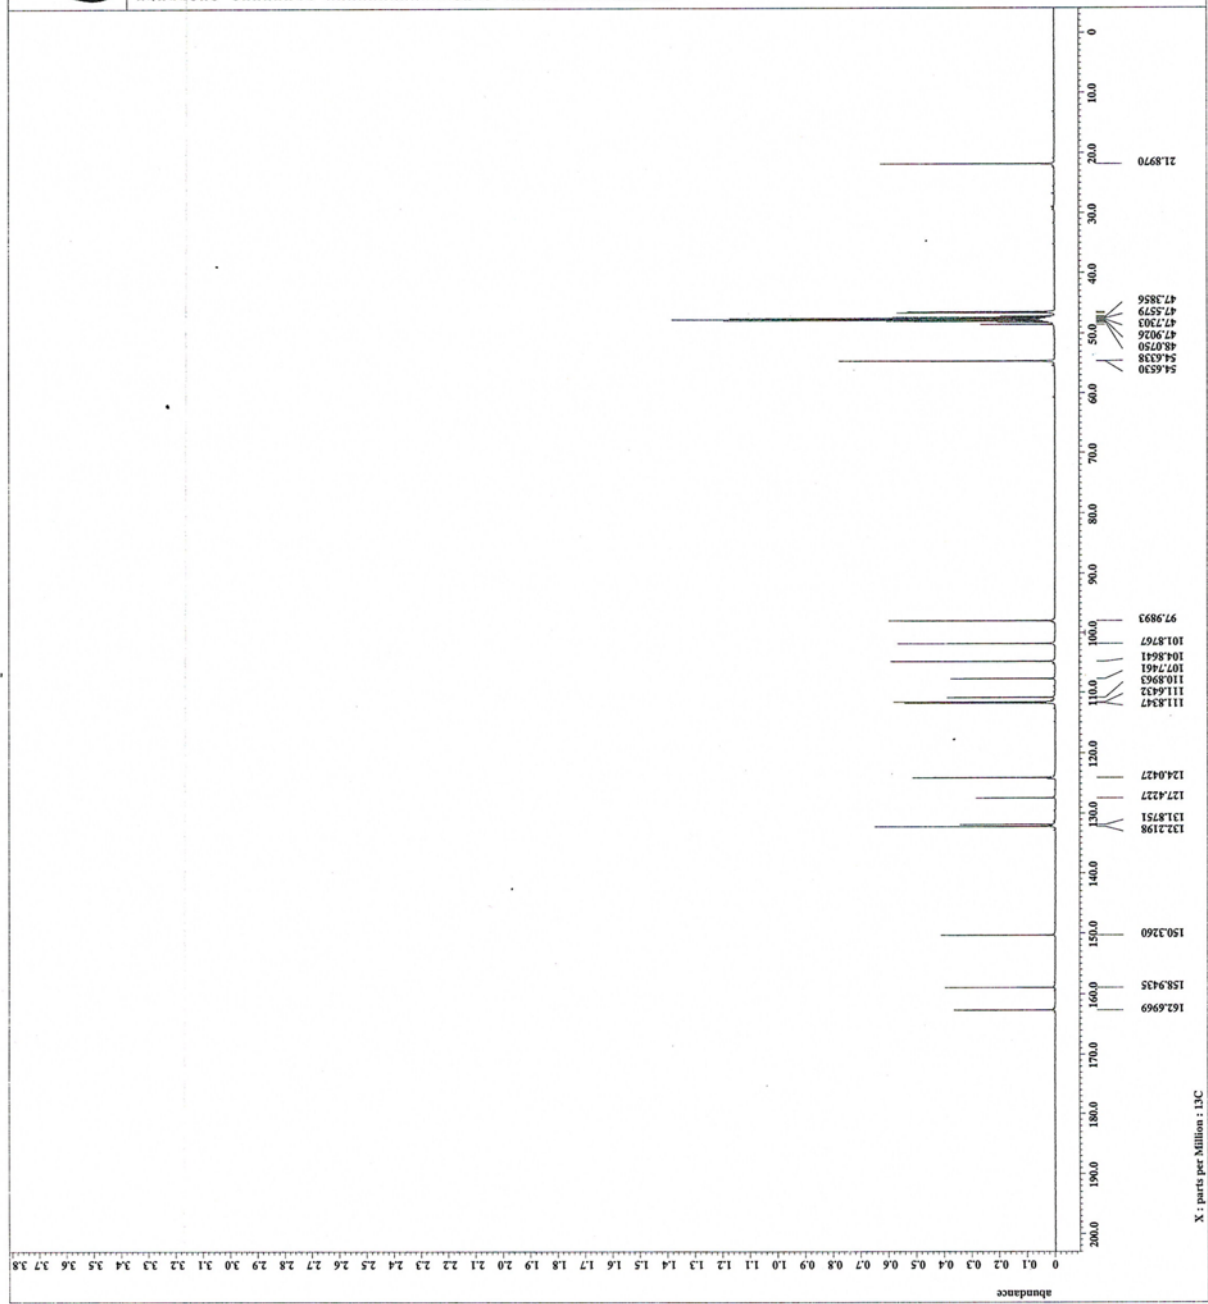

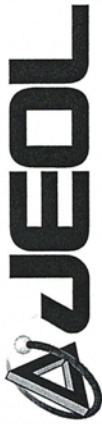

Filename = 20110901-4\_3d2  
Experiment = single\_pulse.exe2  
Sample\_id = 8878178  
Sample = 8-NOV-2018 18:23:55  
Creation\_Time = 9-NOV-2018 09:08:52  
Revision\_Time = 9-NOV-2018 09:08:52  
Current\_Time = 9-NOV-2018 09:08:52  
Content = single\_pulse  
Dir\_name = 13187  
Dir\_size = 131872828  
Dir\_title = 1H  
Dimensions = X 1  
Site = MCA\_500  
Spectrometer = MCA500\_NMR  
F1ld\_strength = 11.62526212 [T] (500M)  
X\_domain = 1H 64829212 [G]  
X\_freq = 500.1391398 [MHz]  
X\_points = 6584  
X\_resolution = 0.2668198 [Hz]  
X\_swept = 5.24877563 [kHz]  
ir\_domain = 1H 11391398 [MHz]  
ir\_freq = 5 [ppm]  
ir\_offset = 1H 11391398 [MHz]  
ir\_points = 5 [ppm]  
Clipped = FALSE  
Scans = 16  
Total\_scans = 16  
X\_f0\_width = 12.7 [us]  
X\_acc\_time = 1.76422912 [s]  
X\_acq\_time = 3.3 [s]  
X\_atq = 3.3 [s]  
X\_pulse = 6.35 [us]  
X\_rf\_mode = OFF  
X\_rf\_mode = OFF  
Dance\_preset = FALSE  
Dance\_preset = FALSE  
Relaxation\_delay = 5 [s]  
Relaxation\_delay = 22.5 [s]  
Relaxation\_time = 22.5 [s]  
Temp\_0pt = 300

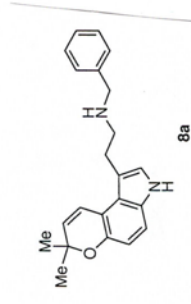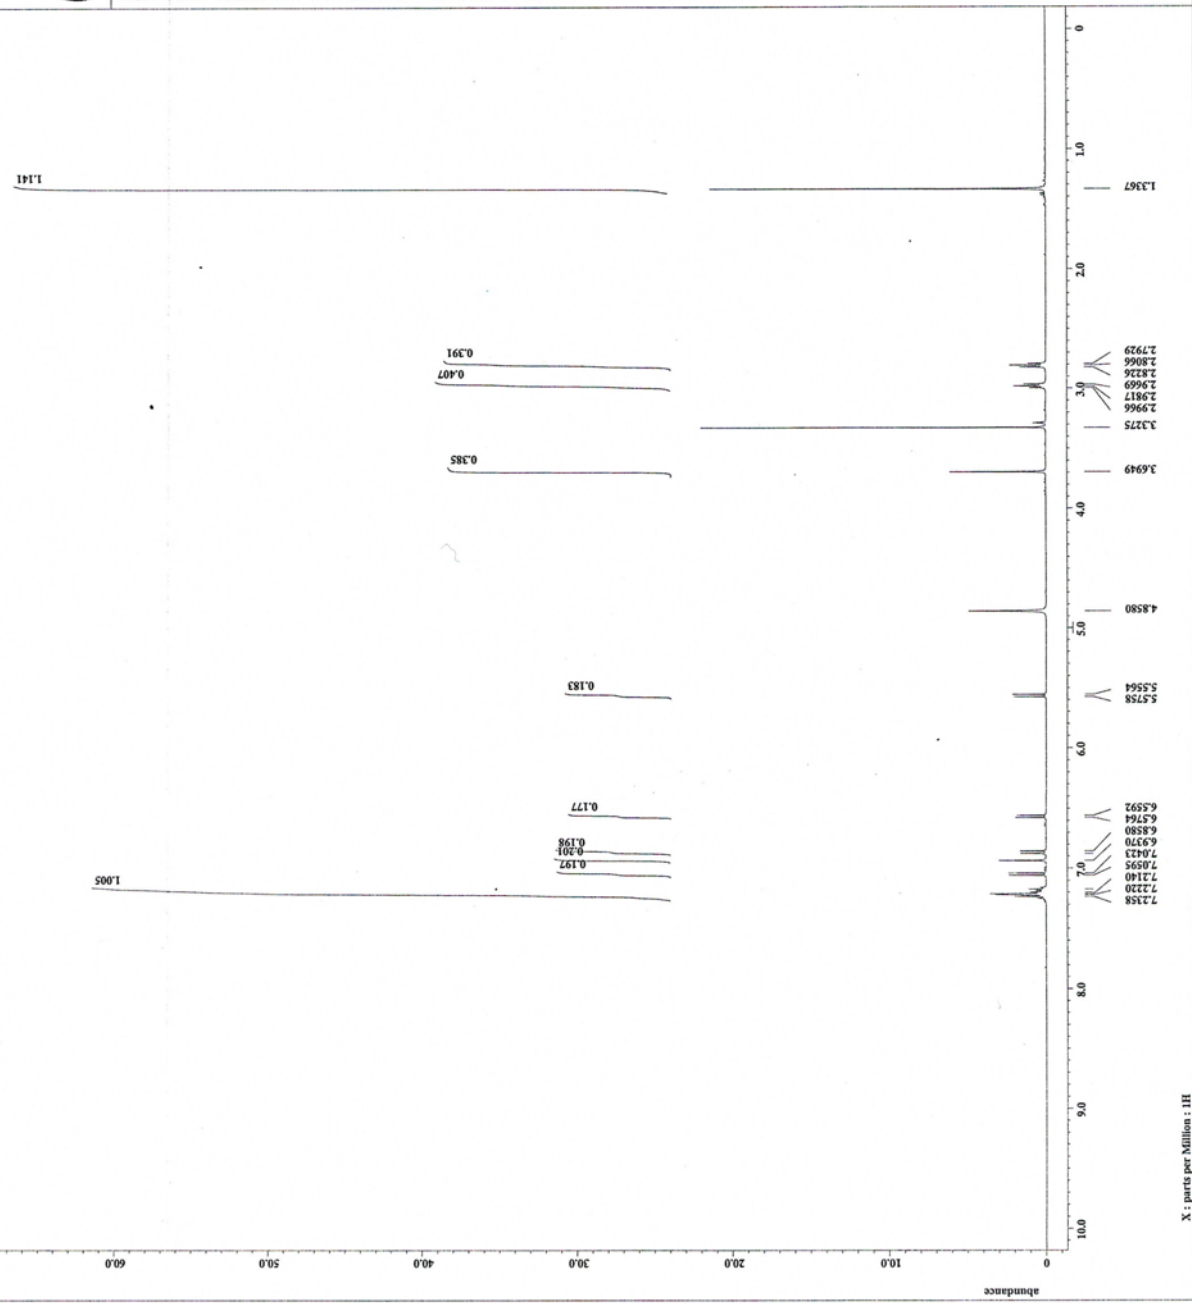



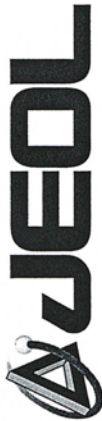

```

Filename = 201812202-5.jdf
Experiment = single_pulse.exe2
Sample_id = 8855313
Sample_name = 22-NOV-2018
Creation_time = 22-NOV-2018 24:54:27
Revision_time = 22-NOV-2018 15:32:27
Current_time = 22-NOV-2018 15:32:29
Content = single_pulse
Pulse_program = 13302PRFLX
Dir_name = IN
Dir_title = IN
Dimensions = X(1)
Site = ECA 500
Spectrometer = DELTA2_HHR
Field_strength = 11.62926421[T] (500 MHz)
X_acq_duration = IN (6.622512[s])
X_freq = 498.13131398[MHz]
X_offset = 0.00000000
X_prescans = 1
X_resolution = 0.25681616[Hz]
X_rf_domain = IN (48677453)
X_rf_freq = 498.13131398[MHz]
X_rf_offset = 0.00000000
X_rf_domain = IN (48677453)
X_rf_freq = 498.13131398[MHz]
X_rf_offset = 0.00000000
Clipped_at = FALSE
Mod_return = 1
Total_scans = 16
X_80_width = 12.7[us]
X_acq_time = 1.76422512[s]
X_angle = 45.0[deg]
X_p1 = 9.00[us]
X_pulse = 6.35[us]
X_rf_mode = off
X_rf_offset = 0.00000000
X_rf_domain = FALSE
X_rf_freq = 498.13131398[MHz]
X_rf_offset = 0.00000000
Initial_wait = 1[s]
X_rf_offset = 0.00000000
Repetition_delay = 5[s]
Repetition_time = 6.76422512[s]
Temp_set = 22.4[degC]
  
```

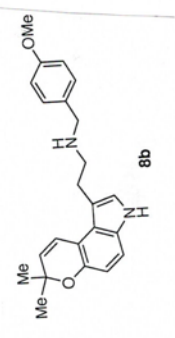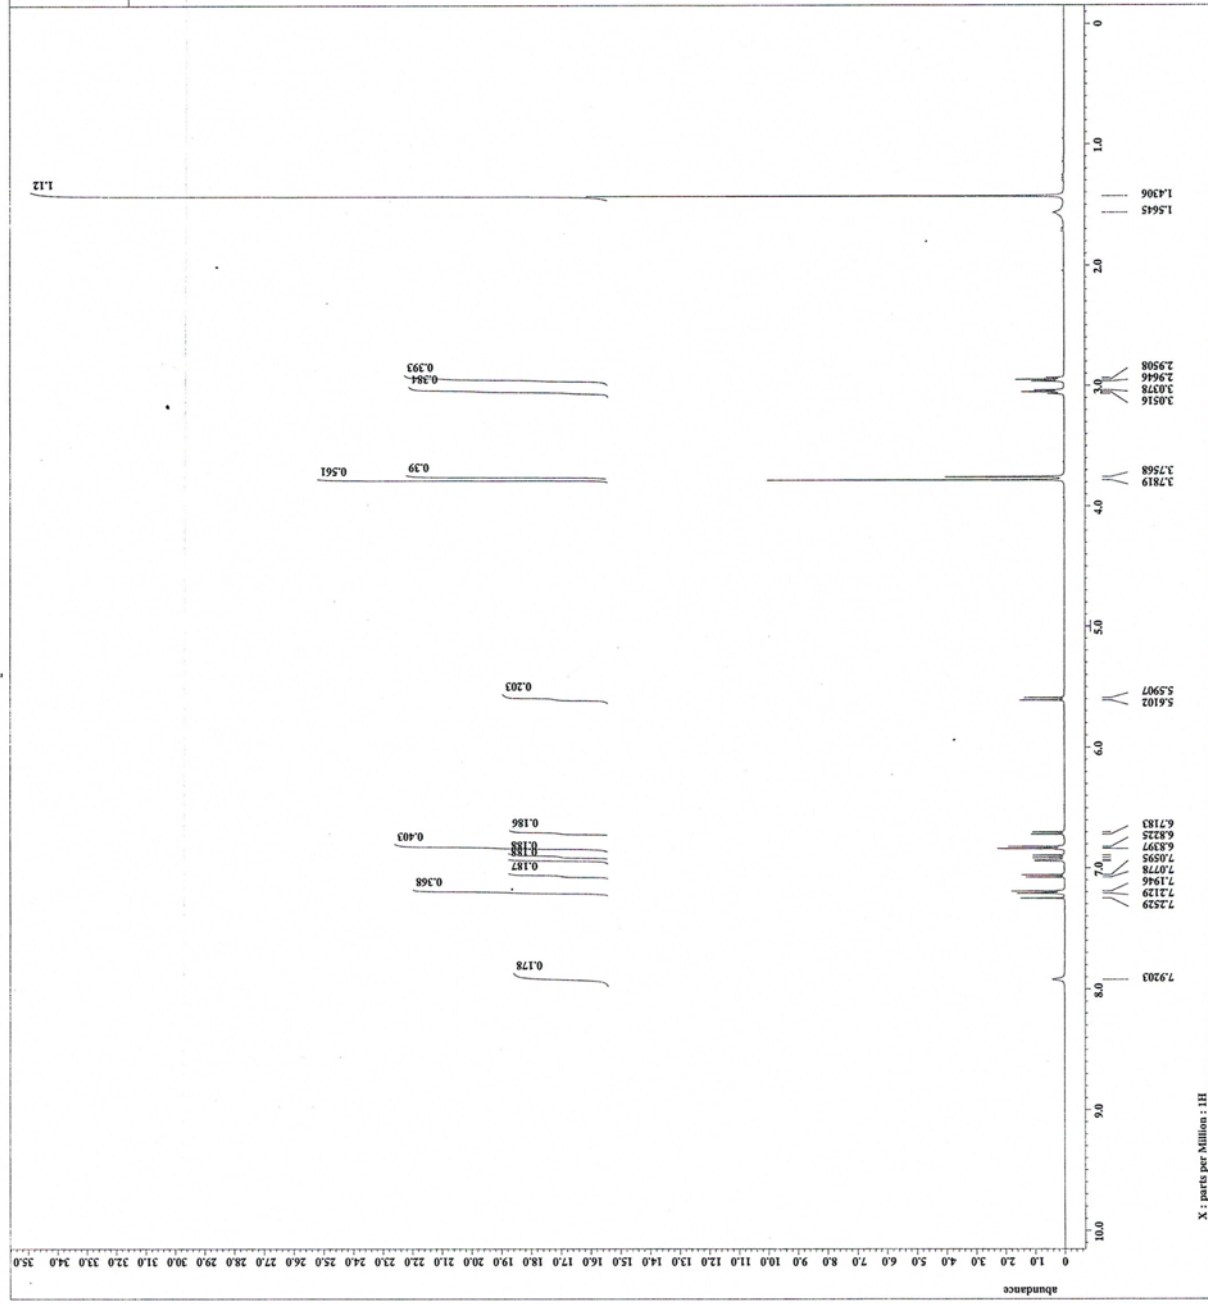



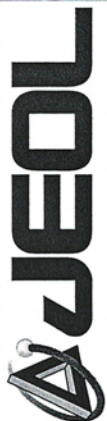

File Name = 201112102-10\_jeol  
Autob =  
Experiment = single\_pulse\_dec  
Sample = CML203028M-D  
Creation\_Time = 23-NOV-2018 09:12:58  
Revision\_Time = 23-NOV-2018 09:12:58  
Current\_Time = 23-NOV-2018 10:25:20  
Concept = single pulse decouple  
Dir\_title =  
Dir\_size = 26214  
Dimensions = 13C  
Site = X  
Spectrometer = MCA 520  
Field\_strength = 11.6226421[T] (500[M  
X\_domain = 13C  
X\_freq = 124.5610055[MHz]  
X\_points = 32748  
X\_prescans = 4  
X\_resolution = 1.828228[Hz]  
X\_sweep = 39.66251[MHz]  
Irr\_domain = 1H  
Irr\_offset = 11.13191398[MHz]  
Clipped = TRUE  
Spectrum = 18994  
Stops = 18994  
Total\_scans = 10.6[us]  
X\_90\_width = 0.838608[us]  
X\_acq\_time = 5.5[us]  
X\_gain = 2.5333333[us]  
X\_pulse\_dec = 20.544[us]  
Irr\_sun\_pos = 20.544[us]  
Irr\_noise = 10.6[us]  
Initial\_wait = 10  
Roc\_Las = TRUE  
Meovr\_Gain = 60  
Relaxation\_delay = 2[s]  
Acquisition\_time = 22.31[us]  
Temp\_284

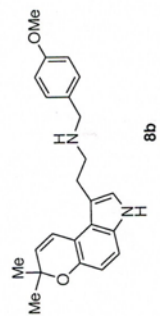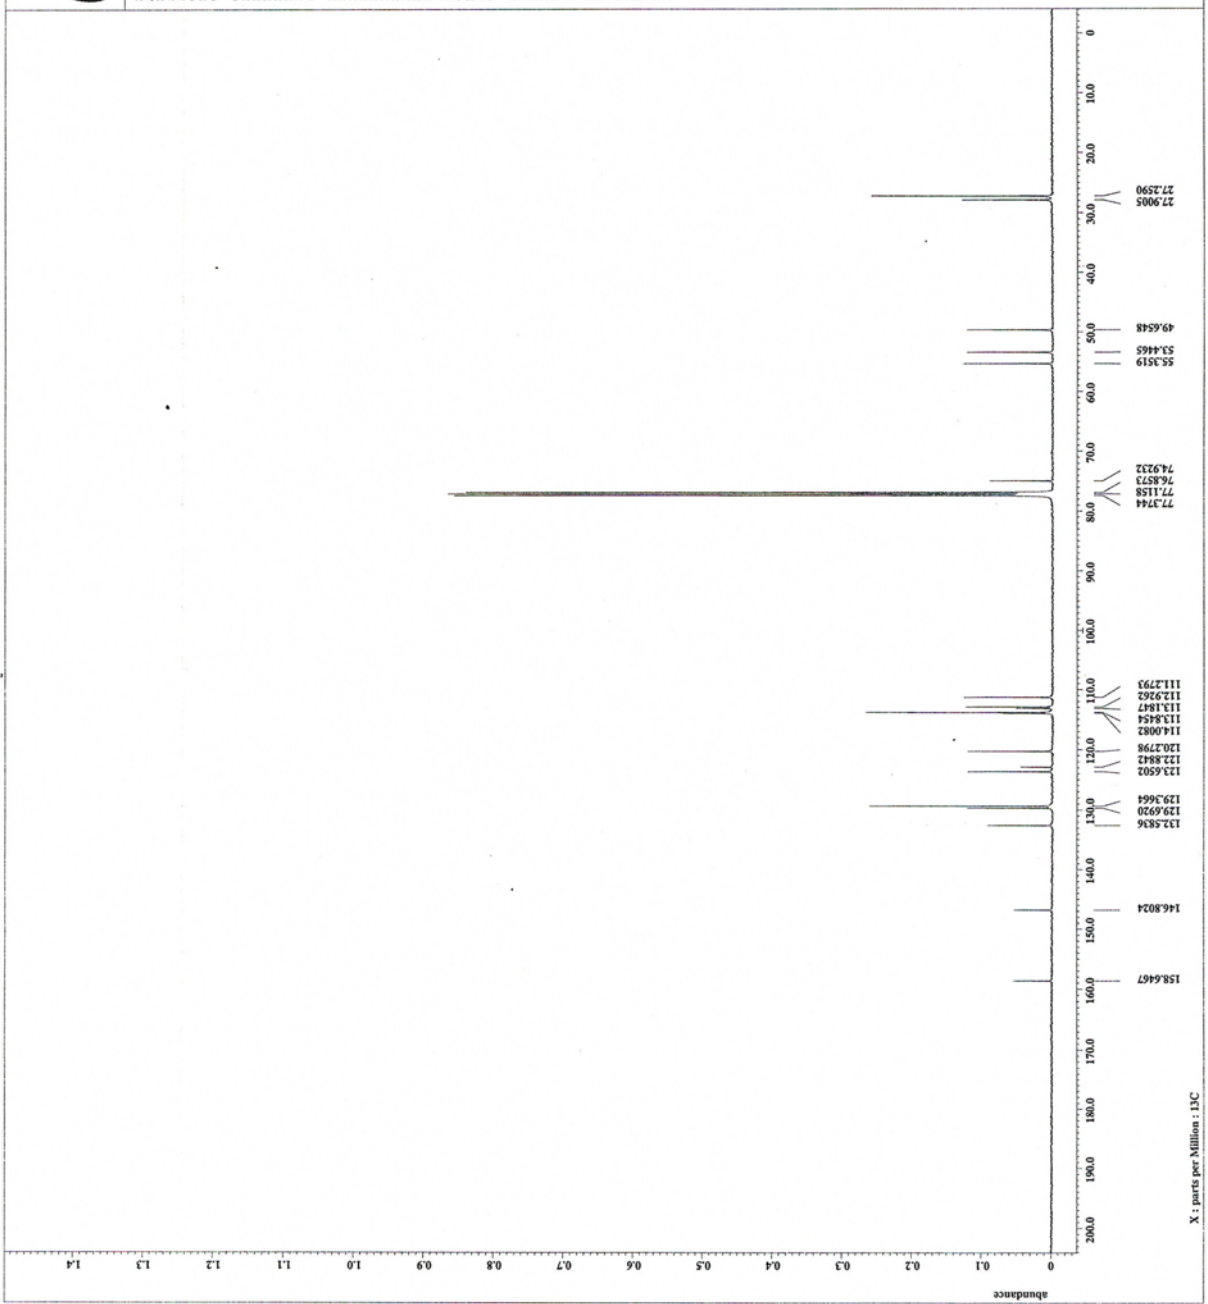

```

Name: 17-06-28-4_jdf
Date:
Author:
Experiment:
Pulse_program:
Solvent:
Creation_time:
Acquisition_time:
Current_time:
Operator:
Date_collected:
Date_format:
Date_size:
Date_unit:
Dimensions:
Site:
Spectrometer:
Field_strength:
X_domain:
X_center:
X_freq:
X_points:
X_resolution:
X_sweep:
Xr_domain:
Xr_offset:
Xr_offset:
Xr_domain:
Xr_offset:
Clipped:
Spectrum:
Total_scans:
X_f0_width:
X_acq_time:
X_acq:
X_gain:
X_pulse:
X_pulse:
Xr_mode:
Xr_mode:
Data_presat:
Data_presat:
Relaxation_delay:
Relaxation_delay:
Sweep_rate:

```

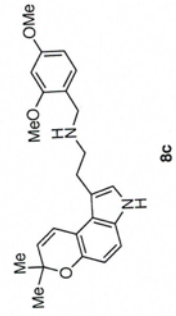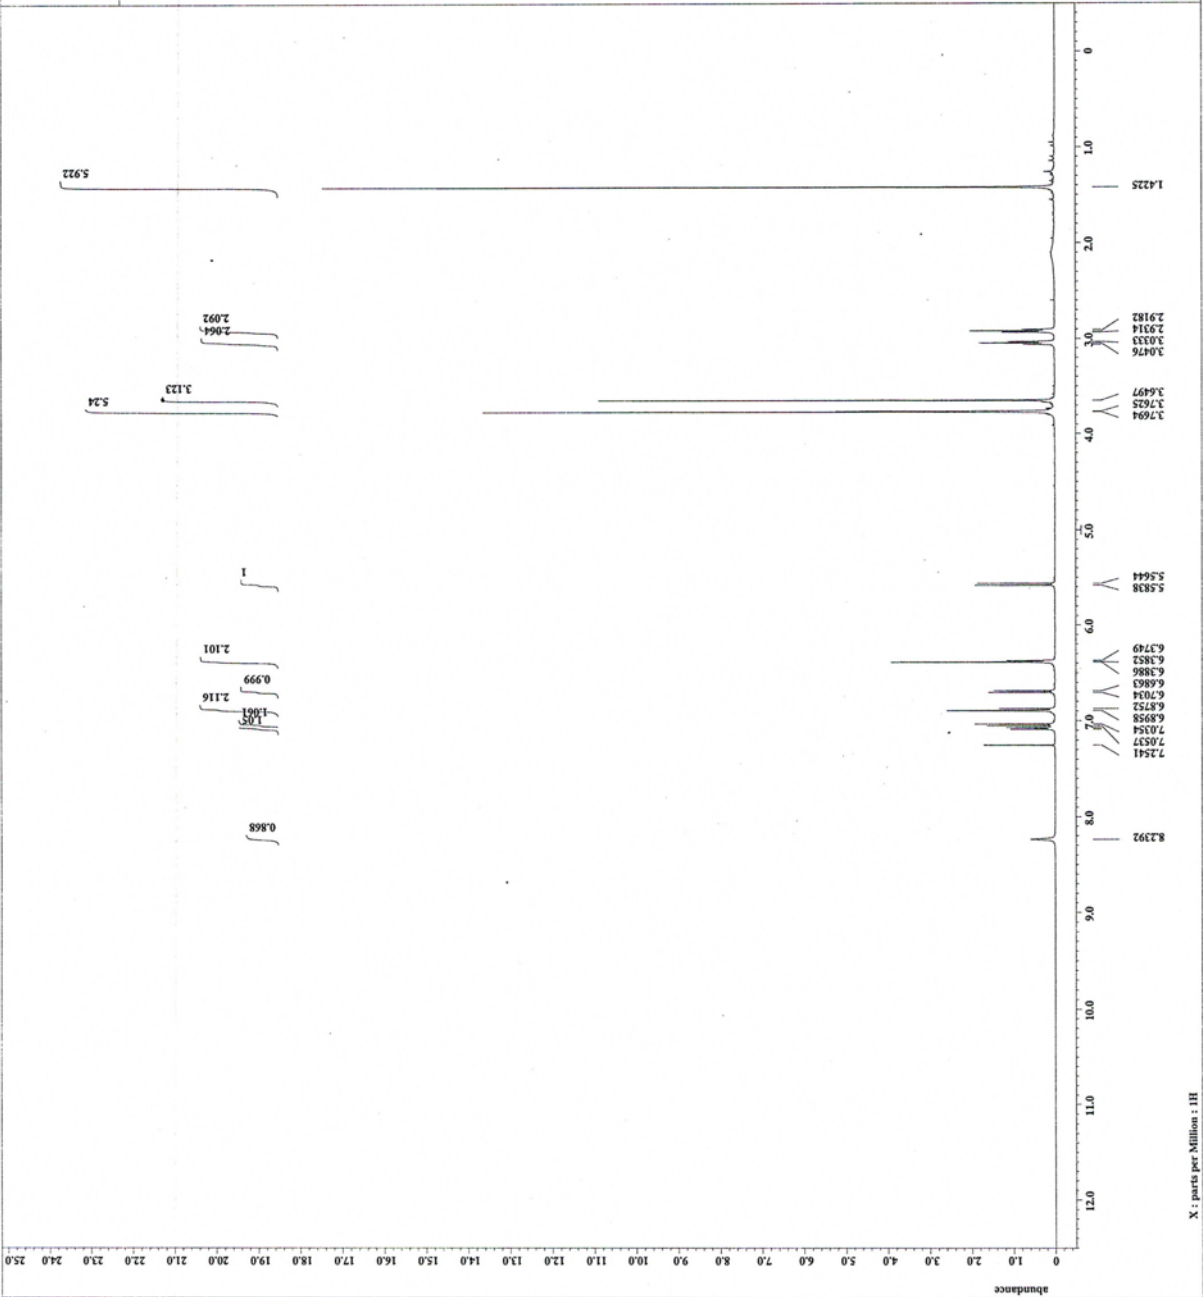

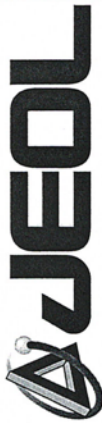

Filename = Yema-17-06-28-8.jdf  
Experiment = single\_pulse\_dec  
Sample\_id = S8613160  
Sample\_name = 28-JUN-2017 07:00:31  
Creation\_time = 28-JUN-2017 07:46:41  
Revision\_time = 28-JUN-2017 07:46:50  
Current\_time = 28-JUN-2017 07:46:50  
Contest = single pulse decouple  
Date\_acq = 20170628  
Date\_time = 13C  
Name\_of\_experiment = X(ppm)  
Name\_of\_site = ECA 500  
Spectrometer = DELTAI\_NMR  
Field\_strength = 11.629262171 (500[M]  
X\_coordination = 11.629262171 (500[M]  
X\_freq = 124.5010659 [MHz]  
X\_offset = 30 [ppm]  
X\_prescans = 4  
X\_resolution = 1.15755 [Hz]  
X\_resolution\_ppm = 18.642 [ppm]  
Irr\_domain = 99.1191398 [MHz]  
Irr\_freq = 18.642 [MHz]  
Irr\_power = FALSE  
Mod\_return = 18632  
Total\_scans = 18632  
X\_90\_width = 10.4 [us]  
X\_acq\_time = 0.8388606 [s]  
X\_acq\_time\_min = 30 [sec]  
X\_pulse = 3.5333333 [us]  
Irr\_en\_dec = 20.8 [dB]  
Irr\_noise = WALZ  
Decoupling = TRUE  
Irr\_en\_dec\_wait = 2 [s]  
Irr\_noise\_wait = 2 [s]  
Irr\_en\_dec\_wait = 2 [s]  
Relaxation\_delay = 2 [s]  
Repetition\_time = 2.8388606 [s]  
Temp\_unit = 21.0 [C]

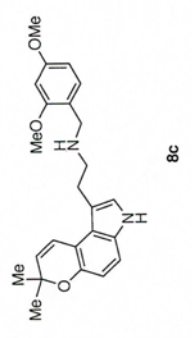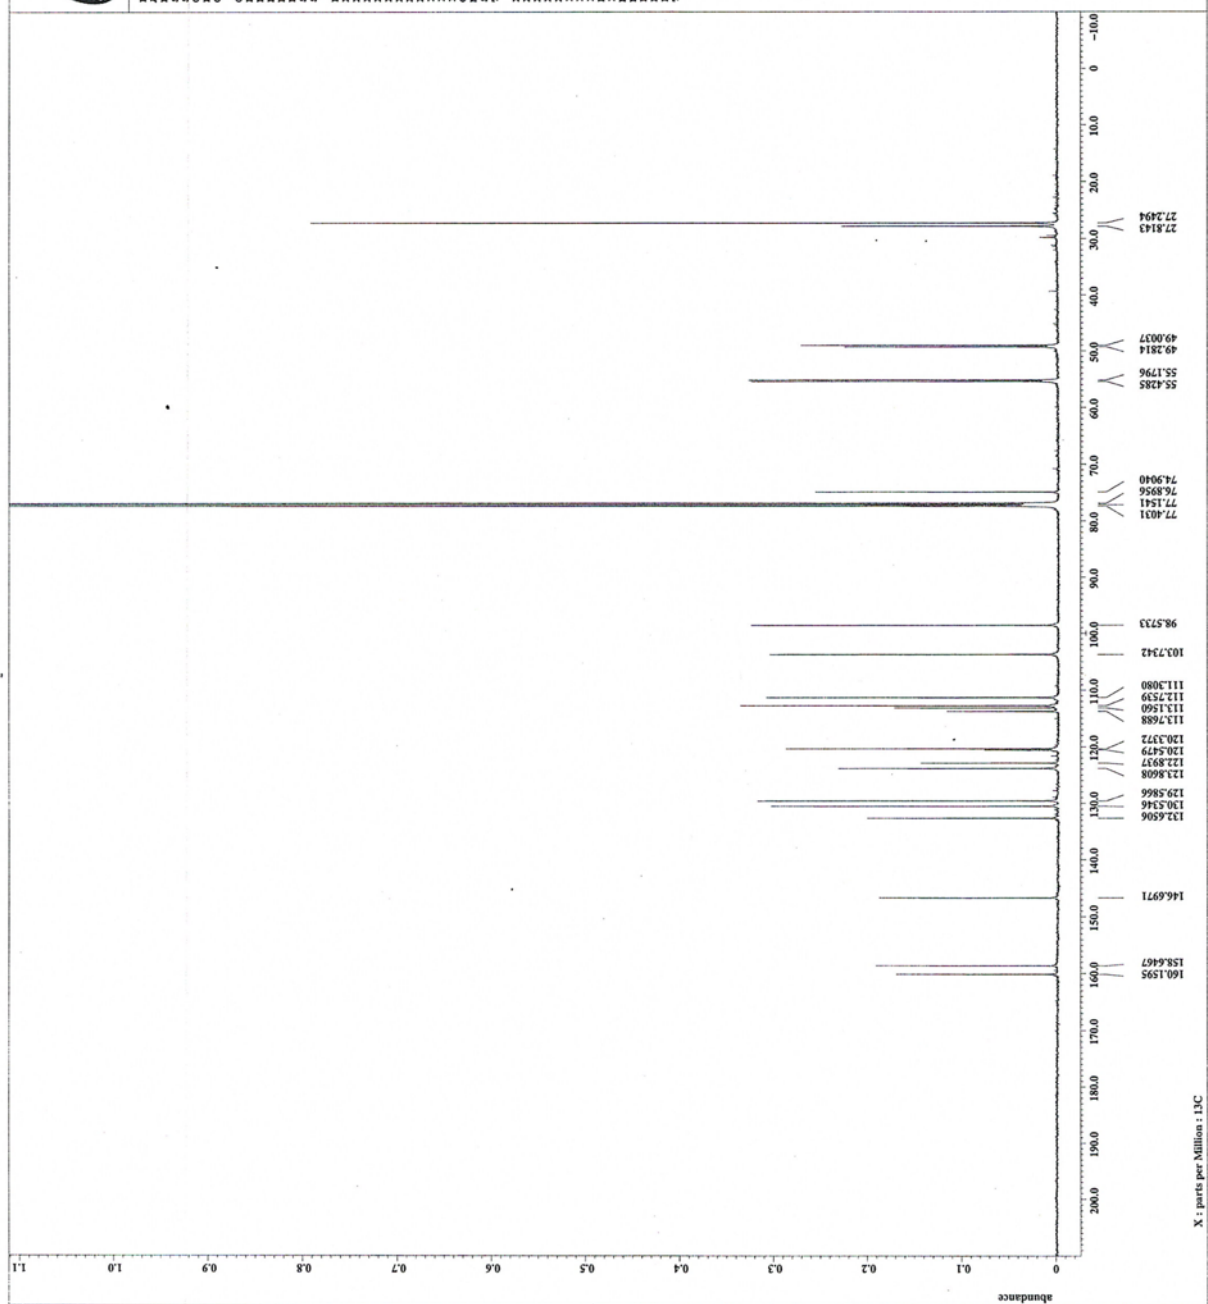













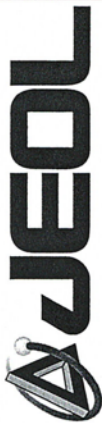

Filename = Xme-18-08-21-11.jdf  
Experiment = single\_pulse\_dec  
Sample\_id = 88656644  
Date\_acq = 21-AUG-2018 06:15:13  
Creation\_time = 21-AUG-2018 07:53:17  
Revision\_time = 21-AUG-2018 07:53:17  
Current\_time = 21-AUG-2018 07:53:02  
Content = single pulse decouple  
Dir\_name = 88656644  
Dir\_title = 13C  
Dimensions = 26214  
X\_name = X  
Site = MCA 550  
Spectrometer = MZRAC\_NMR  
Field\_strength = 11.6282621(7) (500)M  
X\_domain = 13C  
X\_resolution = 0.398608(e)  
X\_freq = 124.5610095 (MHz)  
X\_gamma = 137.48  
X\_points = 4  
X\_prescans = 4  
X\_resolution = 4.82628 (Hz)  
X\_sweep = 39.8625 (MHz)  
IR\_domain = IN  
IR\_resolution = 11.1191398 (MHz)  
IR\_offset = 5 (cm)  
Clipped = TRUE  
Spectrum = 17290  
Scan = 17290  
Total\_scans = 17290  
X\_90\_width = 10.83(fus)  
X\_acq\_time = 0.938608(e)  
X\_delay = 1.00(e)  
X\_wait = 9.5(d)  
X\_pulse = 1.61(us)  
IR\_resolution = 20.548 (cm)  
IR\_sweep = 20.548 (cm)  
IR\_noise = HALT  
Decoupling = TRUE  
Sib\_wait = 2(e)  
Sib\_time = 2(e)  
Relaxation\_delay = 2.038608(e)  
Repetition\_time = 24.4(d)

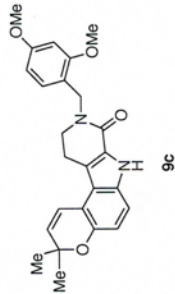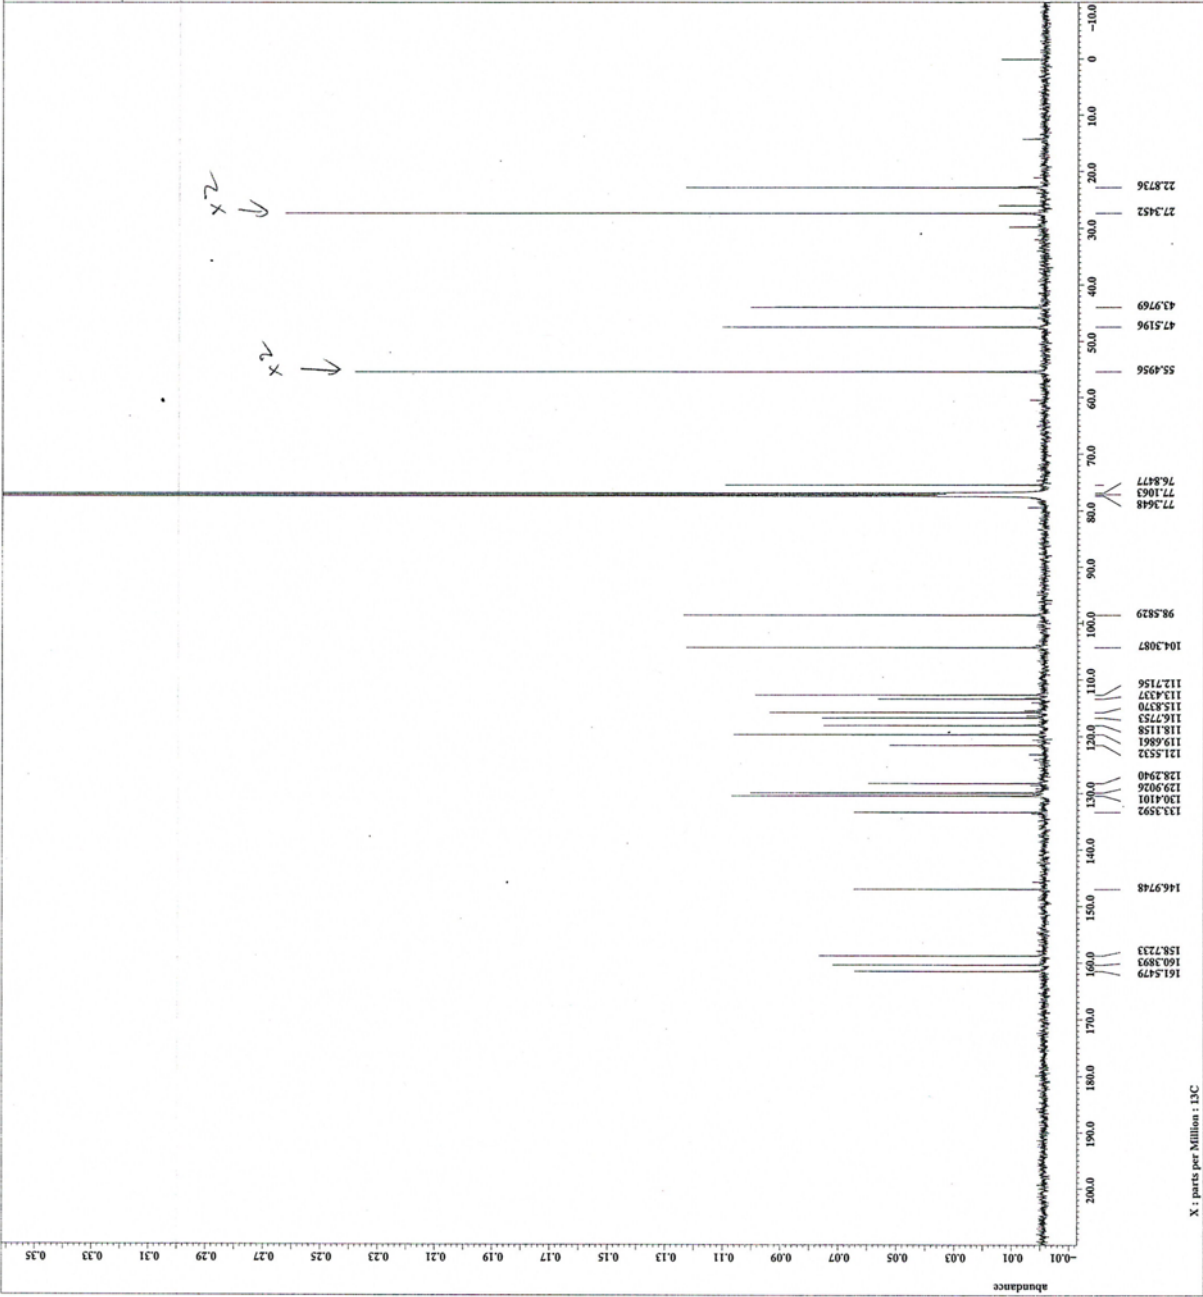

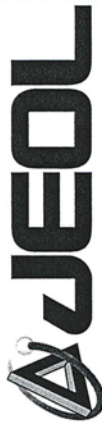

```

=====
File Name      = Yema-18-08-20-4.jdz
Sample Name    = 
Experiment     = single_pulse_002
Sample_ID      = 8845030
Date_Exp      = 20-AUG-2018 11:31:29
Creation_Time  = 20-AUG-2018 11:31:29
Revision_Time  = 20-AUG-2018 12:35:02
Current_Time   = 20-AUG-2018 12:35:22

=====
Contest       = single_pulse
Date_Exp      = 20-AUG-2018 11:31:29
Date_Rev      = 20-AUG-2018 12:35:02
Date_Contest  = 20-AUG-2018 12:35:22
Diag_File     = 
Diag_Title    = 
Diag_Unit     = 
Diag_Min      = 
Diag_Max      = 
Diag_Min2     = 
Diag_Max2     = 
Diag_Min3     = 
Diag_Max3     = 
Diag_Min4     = 
Diag_Max4     = 
Diag_Min5     = 
Diag_Max5     = 
Diag_Min6     = 
Diag_Max6     = 
Diag_Min7     = 
Diag_Max7     = 
Diag_Min8     = 
Diag_Max8     = 
Diag_Min9     = 
Diag_Max9     = 
Diag_Min10    = 
Diag_Max10   = 
Diag_Min11    = 
Diag_Max11   = 
Diag_Min12    = 
Diag_Max12   = 
Diag_Min13    = 
Diag_Max13   = 
Diag_Min14    = 
Diag_Max14   = 
Diag_Min15    = 
Diag_Max15   = 
Diag_Min16    = 
Diag_Max16   = 
Diag_Min17    = 
Diag_Max17   = 
Diag_Min18    = 
Diag_Max18   = 
Diag_Min19    = 
Diag_Max19   = 
Diag_Min20    = 
Diag_Max20   = 
Diag_Min21    = 
Diag_Max21   = 
Diag_Min22    = 
Diag_Max22   = 
Diag_Min23    = 
Diag_Max23   = 
Diag_Min24    = 
Diag_Max24   = 
Diag_Min25    = 
Diag_Max25   = 
Diag_Min26    = 
Diag_Max26   = 
Diag_Min27    = 
Diag_Max27   = 
Diag_Min28    = 
Diag_Max28   = 
Diag_Min29    = 
Diag_Max29   = 
Diag_Min30    = 
Diag_Max30   = 
Diag_Min31    = 
Diag_Max31   = 
Diag_Min32    = 
Diag_Max32   = 
Diag_Min33    = 
Diag_Max33   = 
Diag_Min34    = 
Diag_Max34   = 
Diag_Min35    = 
Diag_Max35   = 
Diag_Min36    = 
Diag_Max36   = 
Diag_Min37    = 
Diag_Max37   = 
Diag_Min38    = 
Diag_Max38   = 
Diag_Min39    = 
Diag_Max39   = 
Diag_Min40    = 
Diag_Max40   = 
Diag_Min41    = 
Diag_Max41   = 
Diag_Min42    = 
Diag_Max42   = 
Diag_Min43    = 
Diag_Max43   = 
Diag_Min44    = 
Diag_Max44   = 
Diag_Min45    = 
Diag_Max45   = 
Diag_Min46    = 
Diag_Max46   = 
Diag_Min47    = 
Diag_Max47   = 
Diag_Min48    = 
Diag_Max48   = 
Diag_Min49    = 
Diag_Max49   = 
Diag_Min50    = 
Diag_Max50   = 
Diag_Min51    = 
Diag_Max51   = 
Diag_Min52    = 
Diag_Max52   = 
Diag_Min53    = 
Diag_Max53   = 
Diag_Min54    = 
Diag_Max54   = 
Diag_Min55    = 
Diag_Max55   = 
Diag_Min56    = 
Diag_Max56   = 
Diag_Min57    = 
Diag_Max57   = 
Diag_Min58    = 
Diag_Max58   = 
Diag_Min59    = 
Diag_Max59   = 
Diag_Min60    = 
Diag_Max60   = 
Diag_Min61    = 
Diag_Max61   = 
Diag_Min62    = 
Diag_Max62   = 
Diag_Min63    = 
Diag_Max63   = 
Diag_Min64    = 
Diag_Max64   = 
Diag_Min65    = 
Diag_Max65   = 
Diag_Min66    = 
Diag_Max66   = 
Diag_Min67    = 
Diag_Max67   = 
Diag_Min68    = 
Diag_Max68   = 
Diag_Min69    = 
Diag_Max69   = 
Diag_Min70    = 
Diag_Max70   = 
Diag_Min71    = 
Diag_Max71   = 
Diag_Min72    = 
Diag_Max72   = 
Diag_Min73    = 
Diag_Max73   = 
Diag_Min74    = 
Diag_Max74   = 
Diag_Min75    = 
Diag_Max75   = 
Diag_Min76    = 
Diag_Max76   = 
Diag_Min77    = 
Diag_Max77   = 
Diag_Min78    = 
Diag_Max78   = 
Diag_Min79    = 
Diag_Max79   = 
Diag_Min80    = 
Diag_Max80   = 
Diag_Min81    = 
Diag_Max81   = 
Diag_Min82    = 
Diag_Max82   = 
Diag_Min83    = 
Diag_Max83   = 
Diag_Min84    = 
Diag_Max84   = 
Diag_Min85    = 
Diag_Max85   = 
Diag_Min86    = 
Diag_Max86   = 
Diag_Min87    = 
Diag_Max87   = 
Diag_Min88    = 
Diag_Max88   = 
Diag_Min89    = 
Diag_Max89   = 
Diag_Min90    = 
Diag_Max90   = 
Diag_Min91    = 
Diag_Max91   = 
Diag_Min92    = 
Diag_Max92   = 
Diag_Min93    = 
Diag_Max93   = 
Diag_Min94    = 
Diag_Max94   = 
Diag_Min95    = 
Diag_Max95   = 
Diag_Min96    = 
Diag_Max96   = 
Diag_Min97    = 
Diag_Max97   = 
Diag_Min98    = 
Diag_Max98   = 
Diag_Min99    = 
Diag_Max99   = 
Diag_Min100   = 
Diag_Max100  = 
Diag_Min101   = 
Diag_Max101  = 
Diag_Min102   = 
Diag_Max102  = 
Diag_Min103   = 
Diag_Max103  = 
Diag_Min104   = 
Diag_Max104  = 
Diag_Min105   = 
Diag_Max105  = 
Diag_Min106   = 
Diag_Max106  = 
Diag_Min107   = 
Diag_Max107  = 
Diag_Min108   = 
Diag_Max108  = 
Diag_Min109   = 
Diag_Max109  = 
Diag_Min110   = 
Diag_Max110  = 
Diag_Min111   = 
Diag_Max111  = 
Diag_Min112   = 
Diag_Max112  = 
Diag_Min113   = 
Diag_Max113  = 
Diag_Min114   = 
Diag_Max114  = 
Diag_Min115   = 
Diag_Max115  = 
Diag_Min116   = 
Diag_Max116  = 
Diag_Min117   = 
Diag_Max117  = 
Diag_Min118   = 
Diag_Max118  = 
Diag_Min119   = 
Diag_Max119  = 
Diag_Min120   = 
Diag_Max120  = 
Diag_Min121   = 
Diag_Max121  = 
Diag_Min122   = 
Diag_Max122  = 
Diag_Min123   = 
Diag_Max123  = 
Diag_Min124   = 
Diag_Max124  = 
Diag_Min125   = 
Diag_Max125  = 
Diag_Min126   = 
Diag_Max126  = 
Diag_Min127   = 
Diag_Max127  = 
Diag_Min128   = 
Diag_Max128  = 
Diag_Min129   = 
Diag_Max129  = 
Diag_Min130   = 
Diag_Max130  = 
Diag_Min131   = 
Diag_Max131  = 
Diag_Min132   = 
Diag_Max132  = 
Diag_Min133   = 
Diag_Max133  = 
Diag_Min134   = 
Diag_Max134  = 
Diag_Min135   = 
Diag_Max135  = 
Diag_Min136   = 
Diag_Max136  = 
Diag_Min137   = 
Diag_Max137  = 
Diag_Min138   = 
Diag_Max138  = 
Diag_Min139   = 
Diag_Max139  = 
Diag_Min140   = 
Diag_Max140  = 
Diag_Min141   = 
Diag_Max141  = 
Diag_Min142   = 
Diag_Max142  = 
Diag_Min143   = 
Diag_Max143  = 
Diag_Min144   = 
Diag_Max144  = 
Diag_Min145   = 
Diag_Max145  = 
Diag_Min146   = 
Diag_Max146  = 
Diag_Min147   = 
Diag_Max147  = 
Diag_Min148   = 
Diag_Max148  = 
Diag_Min149   = 
Diag_Max149  = 
Diag_Min150   = 
Diag_Max150  = 
Diag_Min151   = 
Diag_Max151  = 
Diag_Min152   = 
Diag_Max152  = 
Diag_Min153   = 
Diag_Max153  = 
Diag_Min154   = 
Diag_Max154  = 
Diag_Min155   = 
Diag_Max155  = 
Diag_Min156   = 
Diag_Max156  = 
Diag_Min157   = 
Diag_Max157  = 
Diag_Min158   = 
Diag_Max158  = 
Diag_Min159   = 
Diag_Max159  = 
Diag_Min160   = 
Diag_Max160  = 
Diag_Min161   = 
Diag_Max161  = 
Diag_Min162   = 
Diag_Max162  = 
Diag_Min163   = 
Diag_Max163  = 
Diag_Min164   = 
Diag_Max164  = 
Diag_Min165   = 
Diag_Max165  = 
Diag_Min166   = 
Diag_Max166  = 
Diag_Min167   = 
Diag_Max167  = 
Diag_Min168   = 
Diag_Max168  = 
Diag_Min169   = 
Diag_Max169  = 
Diag_Min170   = 
Diag_Max170  = 
Diag_Min171   = 
Diag_Max171  = 
Diag_Min172   = 
Diag_Max172  = 
Diag_Min173   = 
Diag_Max173  = 
Diag_Min174   = 
Diag_Max174  = 
Diag_Min175   = 
Diag_Max175  = 
Diag_Min176   = 
Diag_Max176  = 
Diag_Min177   = 
Diag_Max177  = 
Diag_Min178   = 
Diag_Max178  = 
Diag_Min179   = 
Diag_Max179  = 
Diag_Min180   = 
Diag_Max180  = 
=====
Spectrometer   = ECA 500
Site           = DELTA1_BOR

=====
Field_strength = 11.62926621(7) (500[M]
X_coord        = 11.76422921(6)
X_duration     = 11.76422921(6)
X_freq         = 495.13191398(MHz)
X_fwhm         = 13.994
X_offset       = 13.994
X_resolution   = 1.066445(6)
X_sweep        = 9.28677563(MHz)
X_sub          = 1.066445(6)
Irr_domain    = 1H
Irr_freq      = 595.13191398(MHz)
Irr_gate      = 1H
Tri_domain    = 1H
Tri_freq      = 595.13191398(MHz)
Tri_gate      = 1H
Clipped       = FALSE
Soc_return    = 8
Total_scans   = 8
X_90_width    = 12.63(us)
X_90_time     = 1.76422921(6)
X_acq_time    = 3.1080
X_gate        = 3.1080
X_pulse       = 6.3215(us)
Irr_mode      = Off
Tri_mode      = Off
Date_Preset   = FALSE
Date_Acquire  = 20180820
Date_Rev      = 20180820
Date_Contest  = 20180820
Relaxation_delay = 5(s)
Relaxation_time = 24.661(s)
=====
  
```

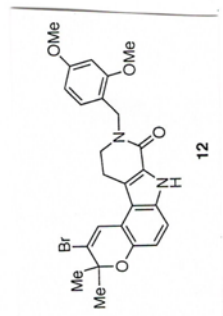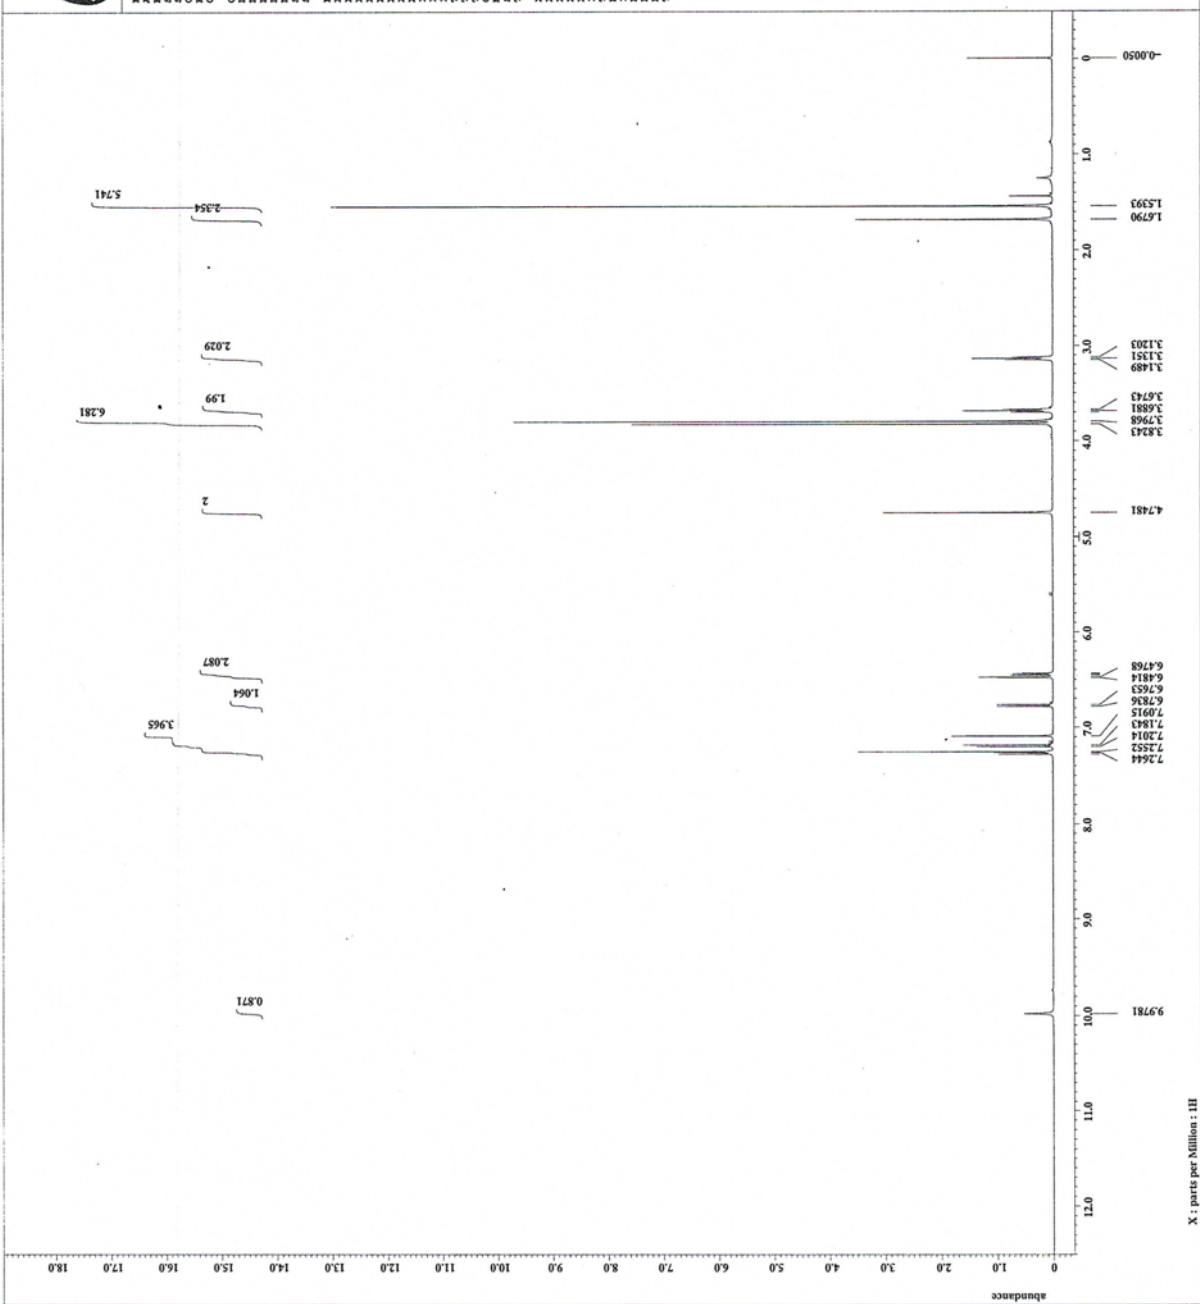

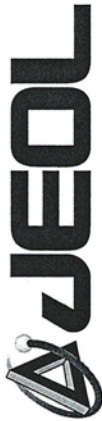

Filename \* yane-18-08-20-8.dzf  
Experiment \* single\_pulse\_dec  
Sample\_id \* 8842106  
Sample\_name \* 18-08-20-8  
Creation\_time \* 20-AUG-2018 11:58:45  
Revision\_time \* 20-AUG-2018 14:02:15  
Current\_time \* 20-AUG-2018 14:02:15  
Content \* single pulse decouple  
Date\_acq \* 20180820  
Date\_time \* 20180820  
Dimensions \* X (ppm)  
Site \* ECA 500  
Spectrometer \* JEOLJNMJ  
Field\_strength \* 11.62926421[T] (500[M  
X\_acq \* 11.62926421[T]  
X\_domain \* 13C  
X\_freq \* 124.9010059 [MHz]  
X\_gamma \* 13  
X\_joints \* 32748  
X\_prescans \* 4  
X\_resolution \* 4.152025 [Hz]  
X\_sweep \* 39.0625 [MHz]  
Irr\_domain \* 1H  
Irr\_freq \* 16.13151398 [MHz]  
Irr\_offset \* 5 [ppm]  
Irr\_pulse \* TRUE  
Clipped \* 1800  
Sofware \* 1800  
Total\_scans \* 1800  
X\_90\_width \* 10.83 [us]  
X\_acq\_time \* 0.8388606 [s]  
X\_delay \* 9.0 [us]  
X\_min \* 9.5 [dB]  
X\_max \* 9.5 [dB]  
X\_pulse\_dec \* 3.6 [us]  
Irr\_min\_pwr \* 20.548 [dB]  
Irr\_max\_pwr \* 20.548 [dB]  
Irr\_pulse \* WALTZ  
Irr\_phase \* 1153  
Initial\_wait \* 1 [s]  
Now\_alm \* TRUE  
Recor\_gain \* 60  
Relaxation\_delay \* 2 [s]  
Spectrum\_time \* 24.3 [sec]  
Temp\_get \* 24.3 [C]

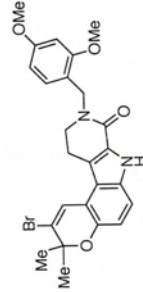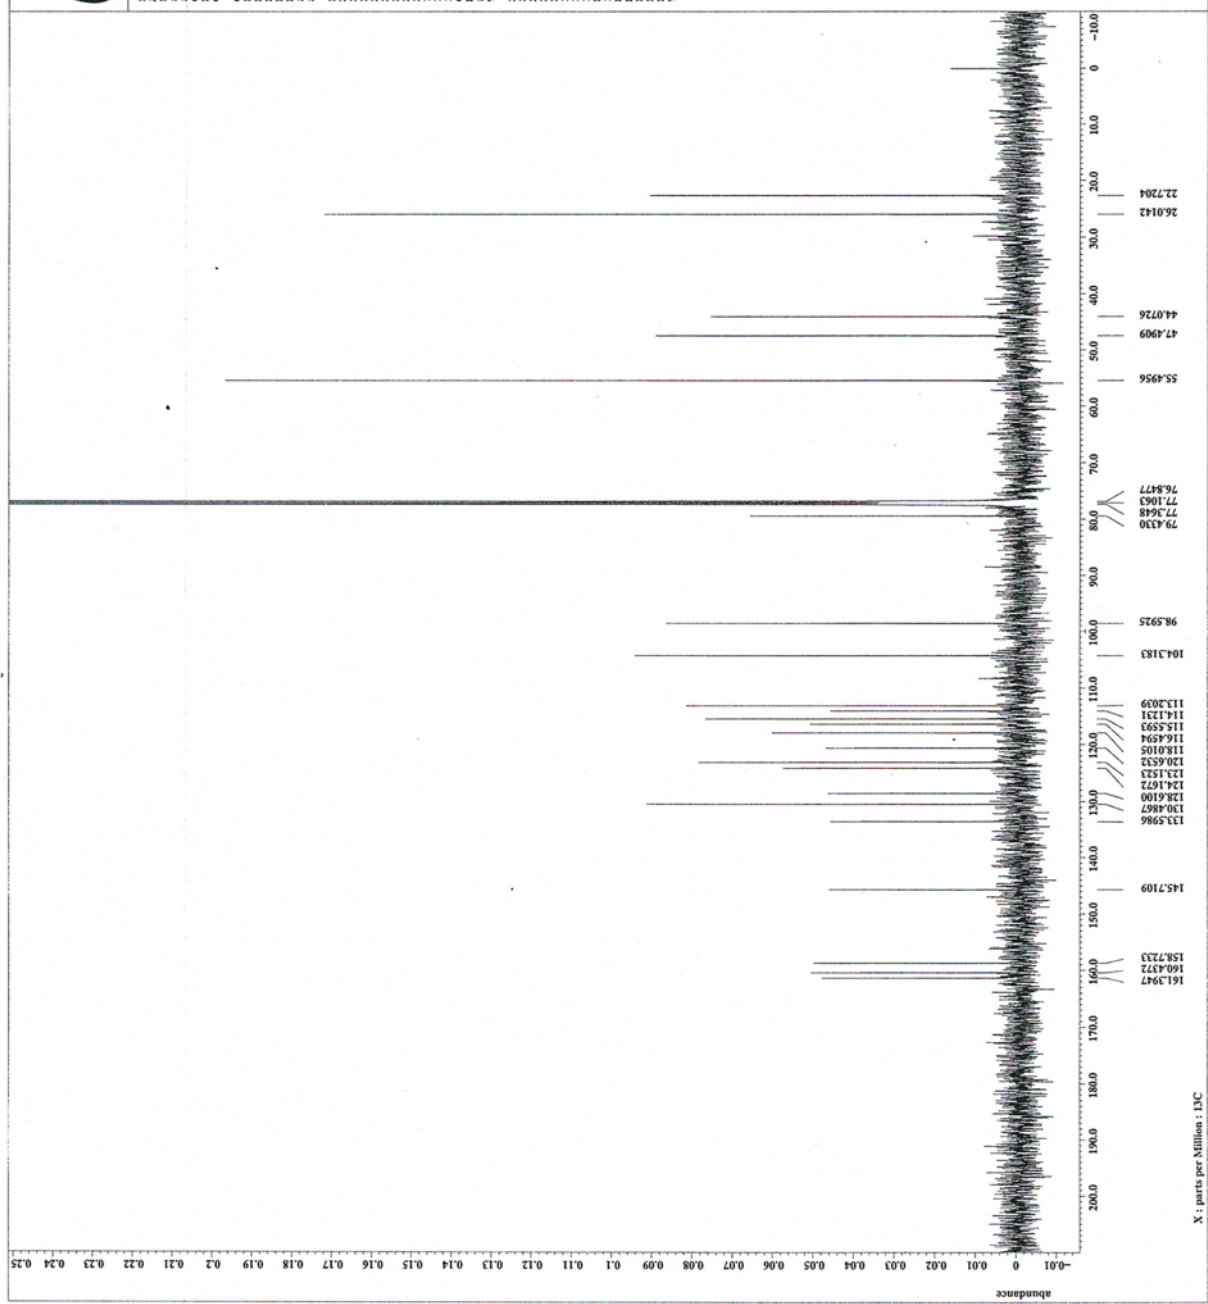







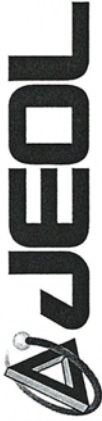

File Name = Yme-19-01-07-15\_1d1  
Experiment = single\_pulse\_dec  
Sample\_ID = 8851245  
Sample\_Name = 13b  
Creation\_Time = 8-JUN-2019 07:41:01  
Revision\_Time = 8-JUN-2019 08:21:59  
Current\_Time = 8-JUN-2019 08:21:25  
Content = single pulse decouple  
Pulse\_Program = zgpg30  
Dim\_title = 13C  
Dim\_x1 = 13C  
Dimensions = X (ppm)  
Site = EUCAL 500  
Spectrometer = EUCAL\_500  
Field\_strength = 11.6226421[T] (500M)  
X\_coordination = 13C  
X\_freq = 125.5019099 [MHz]  
X\_gain = 32746  
X\_offset = 32746  
X\_prescan = 4  
X\_prescan\_delay = 10.000 [us]  
X\_pulseprog = 1Hc\_3131398 [MHz]  
X\_ref = 13C  
X\_ref\_delay = 5 [ppm]  
X\_ref\_offset = TRUE  
X\_ref\_return = 18028  
X\_ref\_return\_delay = 18028  
Total\_scans = 18028  
X\_90\_width = 19.6 [us]  
X\_acq\_time = 0.838606 [s]  
X\_angle = 30 [deg]  
X\_delay = 30 [us]  
X\_pulse = 3.5333333 [us]  
X\_pulse\_delay = 4  
X\_ref\_delay = 20.58 [us]  
X\_ref\_offset = 20.58 [us]  
X\_ref\_return = 18028 [us]  
X\_ref\_return\_delay = 18028 [us]  
Decoupling = TRUE  
Nucleus = 13C  
Nuc1 = 13C  
Nuc2 = 13C  
Nuc3 = 13C  
Relaxation\_delay = 2 [s]  
Repetition\_time = 2.838606 [s]  
Temp\_set = 29.6 [deg]

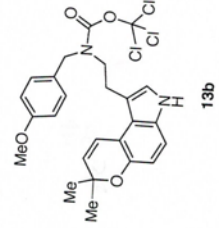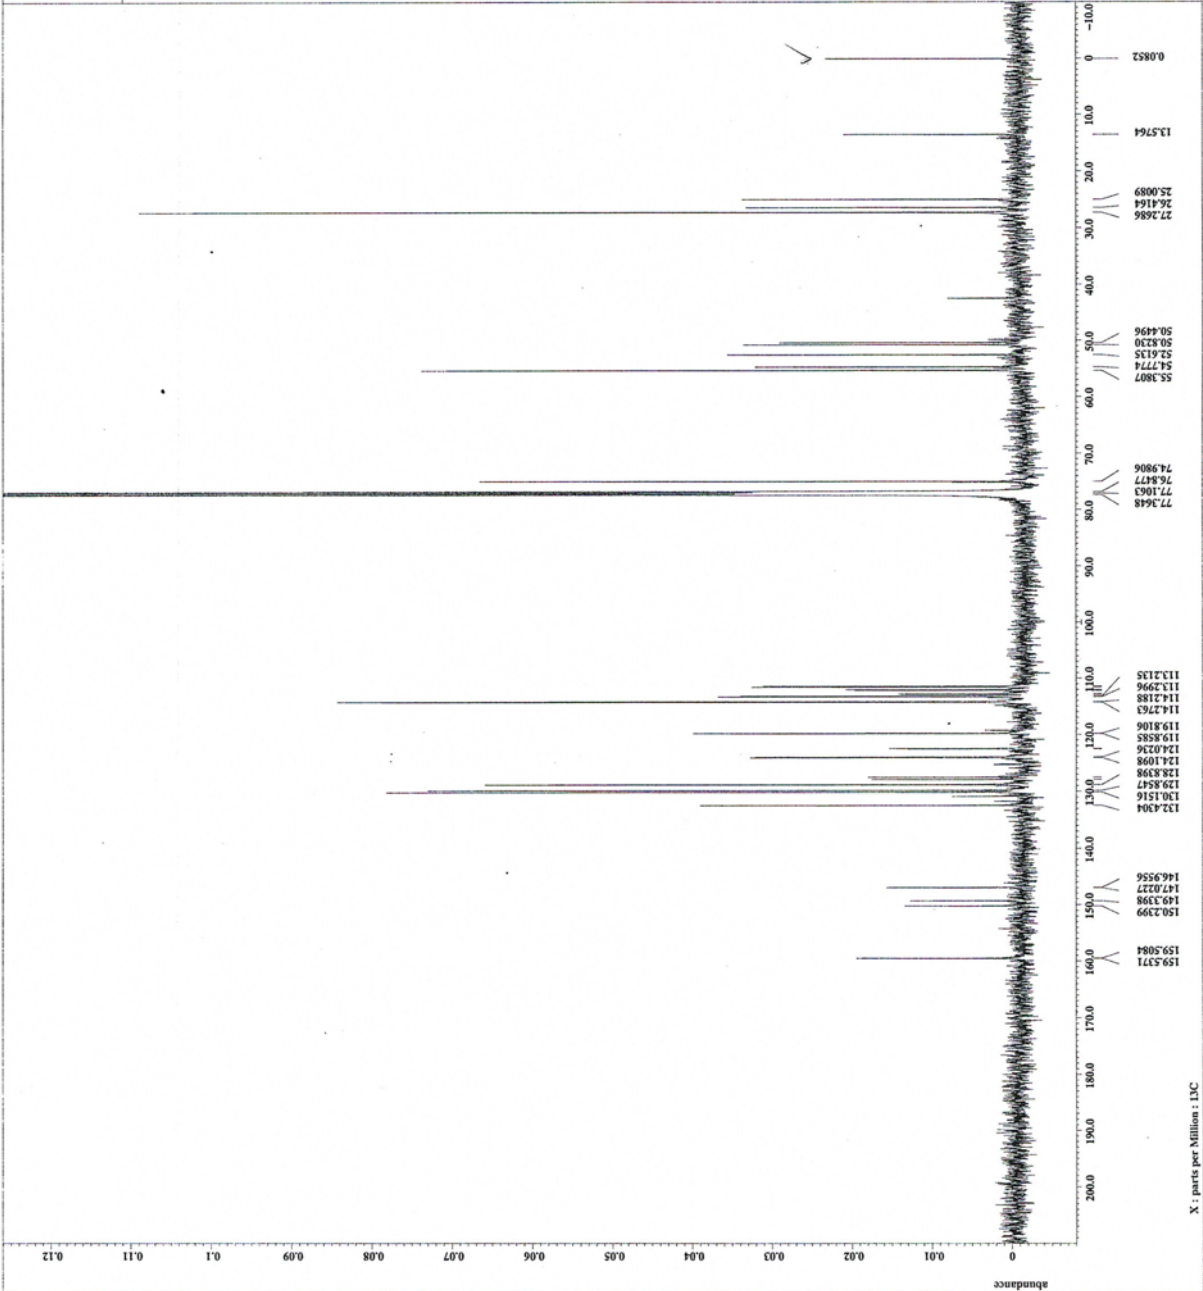

X : parts per Million : 13C





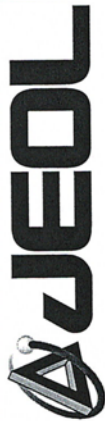

```

----- PROCESSING PARAMETERS -----
4d -> b
prog : 2.0 [Hz] : 0.0 [s]
freq : 400.131000 [MHz] : 80 [N] : 100 [N]
xpr : 0.000000 [s] : 0.000000 [s]
zfc : 1 : TRUE : TRUE
acqphase
pnm
Derived from: 201801602-7.jcf

```

```

-----
Filename      = 201801602-8.jcf
Subst         = 
Manipulation  = single_pulse_dec
Sample_id     = 88550049
Solvent       = 
Date_1        = 8-OCT-2018 10:10:18
Date_2        = 17-OCT-2018 09:18:44
Revision_time = 17-OCT-2018 09:18:44
Current_time  = 17-OCT-2018 09:19:10
Comment       = single pulse decouple
Data_format   = 2D F2
Proc_params   = 2D F2
Dim1          = 13C
Dim2          = 13C
Dim3          = 13C
Dim4          = 13C
Dim5          = 13C
Dim6          = 13C
Dim7          = 13C
Dim8          = 13C
Dim9          = 13C
Dim10         = 13C
Dim11         = 13C
Dim12         = 13C
Dim13         = 13C
Dim14         = 13C
Dim15         = 13C
Spectrometer = ECA500
Site          = DEUTZ_JMR
Field_strength = 11.7473578 [T] (500 [MH]
X_acq_duration = 0.83361792 [s]
X_resolution   = 0.83361792 [Hz]
X_freq        = 125.76529768 [MHz]
X_offset      = 100 [ppm]
X_cp         = 4
X_procs      = 4
X_res        = 1.1995004 [Hz]
X_resol      = 18.3051741 [MHz]
X_domain      = 500.1591521 [MHz]
X_start       = 500.1591521 [MHz]
X_end         = 500.1591521 [MHz]
X_clip_start  = FALSE
X_clip_end    = FALSE
Mod_return    = 1
Mod          = 1
Total_scans   = 22884
X_sb_width   = 12.2 [kHz]
X_sb         = 0.83361792 [s]
X_acq_time   = 30 [sec]
X_angle      = 90
X_pulse      = 4.06666667 [ns]
X_pulse      = 4.06666667 [ns]
Irr_atn_dec  = 20.07 [dB]
Decoupling   = TRUE
Decoupling   = TRUE
Initial_wait = 7 [s]
Initial_wait = 7 [s]
Nox_time     = 2 [s]
Nox_time     = 2 [s]
Rever_gain   = 2 [s]
Rever_gain   = 2 [s]
Repetition_time = 2.83361792 [s]
Repetition_time = 2.83361792 [s]
Temp_get     = 23.3 [C]

```

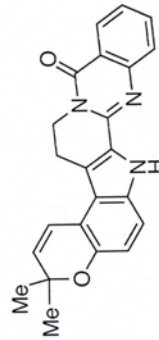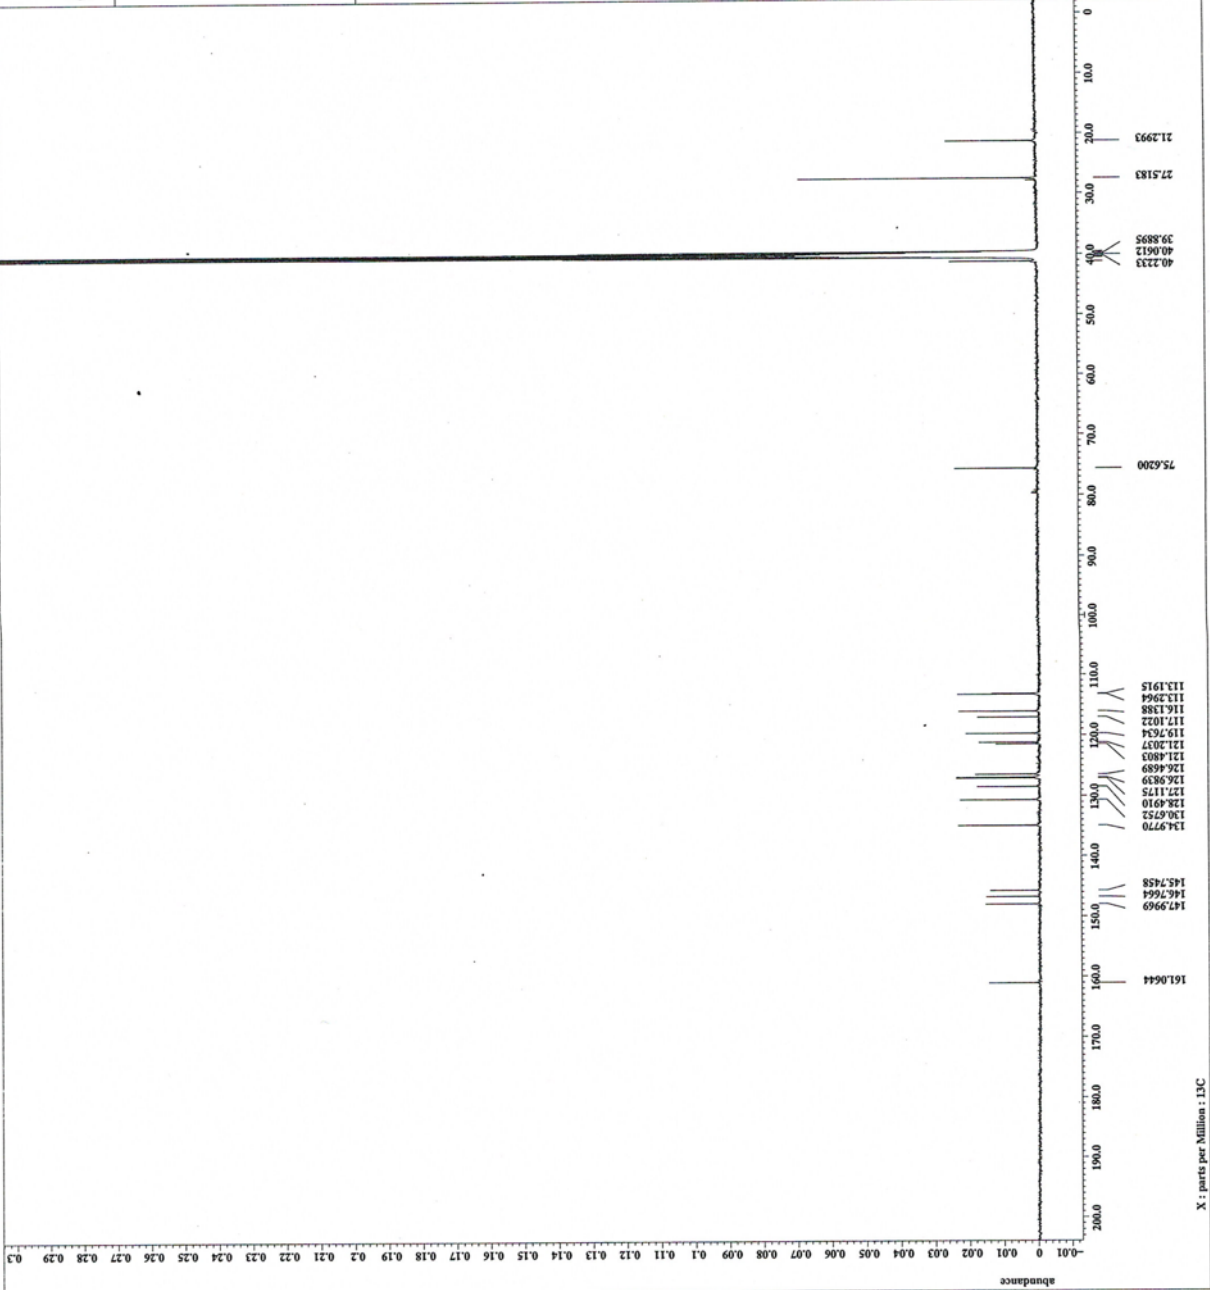

Supplement: c9ra02321f1.pdf [file c9ra02321f1.pdf]
